# Supplementary material for: Has the perovskite LED stability problem been solved?
Source: Royal Society of Chemistry journal article supplement (doi:10.1039/d4tc02975e), 2024-01-01
Supplement: d4tc02975e1.pdf [file d4tc02975e1.pdf]

ARTICLE

## Supplementary Information

### Has the perovskite LED stability problem been solved?

Muhammad Umair Ali,<sup>a</sup> Atta Ur Rehman,<sup>a</sup> and Aleksandra B. Djurišić<sup>\*a</sup>

<sup>a</sup>Department of Physics, The University of Hong Kong, Pokfulam Road, Hong Kong

\* Corresponding author: Aleksandra B. Djurišić: [dalek@hku.hk](mailto:dalek@hku.hk)

**Table S1.** Performance parameters of LEDs in the blue spectral region. Letters Conv and Inv denote conventional and inverted architecture, respectively. Perovskite emitters are labelled as H and I for hybrid organic and inorganic, respectively, while the dimensionality is denoted as 3D, 2D, and quasi-2D for 3D films  $\text{APbX}_3$ , 2D films  $\text{C}_2\text{PbX}_4$ , and quasi-2D films  $\text{C}_2\text{A}_{n-1}\text{Pb}_n\text{X}_{3n+1}$  respectively, where A denotes small organic cation or  $\text{Cs}^+$  cation, C denotes bulky organic cation, and X denotes halide anion. For 2D and quasi-2D materials with Dion-Jacobson rather than Ruddlesden-Popper structure, the corresponding formulae are  $\text{CPbX}_4$  and  $\text{CA}_{n-1}\text{Pb}_n\text{X}_{3n+1}$  respectively. Label QD/NC denotes quantum dots/nanocrystals, while SC denotes single crystal.  $V_{\text{on}}$  denotes turn-on voltage,  $\text{EQE}_{\text{max}}$  denotes maximum EQE,  $L_{\text{max}}$  denotes maximum luminance,  $\lambda$  denotes emission wavelength,  $T_{50}$  denotes operational lifetime at 100  $\text{cd}/\text{m}^2$  (unless specified otherwise).

| Device                 | $V_{\text{on}}$ (V) | $L_{\text{max}}$ ( $\text{cd}/\text{m}^2$ ) | $\text{EQE}_{\text{max}}$ (%) | $\lambda$ (nm) | $T_{50}$                                                                     | Ref. |
|------------------------|---------------------|---------------------------------------------|-------------------------------|----------------|------------------------------------------------------------------------------|------|
| Conv, H, quasi-2D      | 2.1                 | 10392                                       | 14.5                          | 493            | 13.85 min                                                                    | S1   |
| Conv, H, quasi-2D      | 3.0                 | 2541                                        | 16.07                         | 486            | 5 min                                                                        | S2   |
| Conv, H, SC exfoliated | ~4.5                | 0.1                                         | 0.02                          | 440            | 17 s at 0.1 $\text{cd}/\text{m}^2$                                           | S3   |
| Inv, H, quasi-2D       | 3.1                 | 6426                                        | 2.58                          | 475            | 16 h at 1000 $\text{cd}/\text{m}^2$                                          | S4   |
| Conv, I, QDs           | ~3                  | 151.32                                      | 0.81                          | 488            | 1.97 min                                                                     | S5   |
| Conv, I, QDs           | ~2.4                | 847.6                                       | 5.46                          | 464            | 14 min                                                                       | S6   |
| Conv, H, quasi-2D      | ~3.1                | 163.2                                       | 5.8                           | 467            | 25 min                                                                       | S7   |
| Conv, H, quasi-2D      | 3.6                 | 2686.45                                     | 10.16                         | 490            | 4 min                                                                        | S8   |
| Conv, H, quasi-2D      | ~3V                 | 2191                                        | 12.1                          | 488            | ~400 s                                                                       | S9   |
| Conv, I, QDs           | 3.7                 | 12060                                       | 10.3                          | 469            | 25 h at 115 $\text{cd}/\text{m}^2$                                           | S10  |
| Conv, I, quasi-2D      | ~3                  | 9040                                        | 11.0                          | 485            | ~100 min                                                                     | S11  |
| Conv, I, QDs           | 3.6                 | 10410                                       | 5                             | 469            | 59.2 h at 115 $\text{cd}/\text{m}^2$ , 80 min at 1700 $\text{cd}/\text{m}^2$ | S12  |
| Conv, H, quasi-2D      | 3.2                 | 1981                                        | 21.4                          | 483            | 125 min                                                                      | S13  |
| Conv, H, quasi-2D      | ~3.5                | ~900                                        | 13.2                          | 473            | 67 min                                                                       | S13  |
| Conv, H, quasi-2D      | ~3.7                | ~600                                        | 7.3                           | 464            | 19 min                                                                       | S13  |
| Conv, H, 3D            | 2.6                 | ~600                                        | 11.0,                         | 477            | 87 s                                                                         | S14  |
| Conv, I, NCs           | 3.6                 | ~300                                        | 11.9                          | 463            | 17 min                                                                       | S15  |
| Conv, H, quasi-2D      | 3.8                 | 442                                         | 3.82                          | 487            | 78s at 30 $\text{cd}/\text{m}^2$                                             | S16  |
| Conv, I, 3D            | ~2.6                | 5351                                        | 4.5                           | 489            | 6.5 min at 96 $\text{cd}/\text{m}^2$                                         | S17  |
| Conv, H, quasi-2D      | ~3                  | 483 c                                       | 5.57                          | 472            | 5.16 min at 80 $\text{cd}/\text{m}^2$                                        | S18  |
| Conv, H, quasi-2D      | 3.3                 | 798                                         | 4.3                           | 468            | 130 s at 60 $\text{cd}/\text{m}^2$                                           | S19  |
| Conv, H, quasi-2D      | 3.7                 | 493                                         | 7.2                           | 473            | 352 s at 50 $\text{cd}/\text{m}^2$                                           | S20  |
| Conv, H, quasi-2D      | 3.2                 | 1937                                        | 14.82                         | 475            | 120 s                                                                        | S21  |
| Conv, H, quasi-2D      | ~2.6                | 941                                         | 17.5                          | 472            | 11.3 min                                                                     | S22  |
| Conv, H, quasi-2D      | ~3.5                | 391                                         | 4.1                           | ~490           | ~60 s                                                                        | S23  |
| Conv, H, quasi-2D      | 3.0                 | 547                                         | 17.32                         | 478            | 306 s                                                                        | S24  |
| Conv, H, 3D            | ~4.5                | ~100                                        | 6.5                           | 448            | ~50 min at 15.9 $\text{cd}/\text{m}^2$                                       | S25  |
| Conv, H, quasi-2D      | ~4.5                | 1750                                        | 6.7                           | 481            | 21.6 min at 67 $\text{cd}/\text{m}^2$                                        | S26  |
| Conv, H, 2D            | ~3.5                | 1315                                        | 3.08                          | 445            | 3.5 h                                                                        | S27  |
| Conv, H, quasi-2D      | ~3.5                | 2224                                        | 13.5                          | 488            | 290 s                                                                        | S28  |
| Conv, H, quasi-2D      | 4.3                 | 1130                                        | 7.84                          | 485            | 311 s                                                                        | S29  |
| Conv, H, quasi-2D      | 2.9                 | 4700                                        | 14.2                          | 488            | 550 s                                                                        | S30  |
| Conv, H, quasi-2D      | 2.8                 | ~10000                                      | 10.6                          | 494            | 20 min at 100 $\text{cd}/\text{m}^2$ , 102 s at 500 $\text{cd}/\text{m}^2$   | S31  |
| Conv, H, quasi-2D      | ~3                  | 1931                                        | 14.2                          | 475            | 72 min                                                                       | S32  |
| Conv, H, quasi-2D      | ~3.6                | 4215                                        | 15.03                         | 490            | 19.6 min                                                                     | S33  |
| Conv, I, QDs           | 2.7                 | 851                                         | 2.8                           | 469            | 126 s                                                                        | S34  |
| Conv, I, 3D            | 2.6                 | 150                                         | 4.1                           | 459            | ~125 s at 10 $\text{cd}/\text{m}^2$                                          | S35  |
| Conv, H, quasi-2D      | 2.9                 | 1926                                        | 6.3                           | 489            | 200 s at 60 $\text{cd}/\text{m}^2$                                           | S36  |
| Conv, H, quasi-2D      | 3.24                | 968                                         | 2.54                          | 483            | 546 s at 45 $\text{cd}/\text{m}^2$                                           | S37  |
| Conv, H, quasi-2D      | 2.8                 | 891                                         | 8.3                           | 470            | 325 s                                                                        | S38  |
| Conv, H, quasi-2D      | 3.0                 | 8170                                        | 13.15                         | 497            | 16.2                                                                         | S39  |
| Conv, H, quasi-2D      | ~3                  | 710                                         | 11.87                         | 468            | 23 min                                                                       | S40  |
| Conv, H, quasi-2D      | 3.0                 | 1094.9                                      | 10.32                         | 487            | 52.3 min                                                                     | S41  |
| Conv, H, quasi-2D      | 3.4                 | 3028                                        | 16.55                         | 493            | 52 s                                                                         | S42  |
| Conv, H, quasi-2D      | ~2.8                | 1628                                        | 7.9                           | 478            | 630 s                                                                        | S43  |

|                   |      |        |       |     |                                                                  |     |
|-------------------|------|--------|-------|-----|------------------------------------------------------------------|-----|
| Conv, H, quasi-2D | 3.0  | 840    | 9.0   | 492 | 261 s at 66 cd/m <sup>2</sup>                                    | S44 |
| Conv, H, quasi-2D | 3.1  | 8600   | 12.2  | 488 | 160 min at 270 cd/m <sup>2</sup> ,                               | S45 |
| Conv, H, quasi-2D | 2.4  | 958    | 10.85 | 486 | 6.5 min                                                          | S46 |
| Conv, H, quasi-2D | ~3.0 | ~900   | 6.7   | 475 | ~180 s at 161 cd/m <sup>2</sup>                                  | S47 |
| Conv, I, QDs      | ~3   | 11100  | 8.7   | 470 | 35 h at 100 cd/m <sup>2</sup>                                    | S48 |
| Conv, H, quasi-2D | 3.3  | 3131   | 14.82 | 487 | 2900 s at 178 cd/m <sup>2</sup>                                  | S49 |
| Conv, I, QDs      | ~3.7 | 3850   | 4.7   | 470 | 12 h at 100 cd/m <sup>2</sup> , 100 min at 552 cd/m <sup>2</sup> | S50 |
| Conv, I, 3D       | 3.5  | 1775   | 9.2   | 490 | 740 s                                                            | S51 |
| Conv, H, quasi-2D | 3.6  | 1390   | 12.8  | 486 | 16.2 min at 150 cd/m <sup>2</sup>                                | S52 |
| Conv, H, quasi-2D | ~3.0 | 2257   | 8.5   | 490 | 3.6 min                                                          | S53 |
| Conv, I, NCs      | 3.6  | 158    | 3.18  | 460 | 372 s at 81.8 cd/m <sup>2</sup>                                  | S54 |
| Conv, I, QDs      | ~3   | 6113   | 13.8  | 495 | 1000 s at 440 cd/m <sup>2</sup>                                  | S55 |
| Conv, I, Platelet | 2.6  | 1511   | 4.15  | 455 | 50 min                                                           | S56 |
| Conv, H, quasi-2D | ~3.2 | 368    | 12.31 | 486 | ~220 s at 40 cd/m <sup>2</sup>                                   | S57 |
| Conv, H, quasi-2D | 3V   | 548.65 | 10.98 | 480 | 7.68 min                                                         | S58 |
| Conv, H, quasi-2D | 3.07 | 1765   | 7.51  | 488 | 3961 s                                                           | S59 |
| Conv, H, 2D       | ~3.8 | 4015   | 2.01  | 484 | 300 min at 80 cd/m <sup>2</sup>                                  | S60 |
| Conv, H, 3D       | 2.0  | 18480  | 24.4  | 496 | 173 s at 1861 cd/m <sup>2</sup> , 60 s at 778 cd/m <sup>2</sup>  | S61 |

**Table S2.** Performance parameters of LEDs in the green spectral region. Letters Conv and Inv denote conventional and inverted architecture, respectively. Perovskite emitters are labelled as H and I for hybrid organic and inorganic, respectively, while the dimensionality is denoted as 3D, 2D, and quasi-2D for 3D films  $\text{APbX}_3$ , 2D films  $\text{C}_2\text{PbX}_4$ , and quasi-2D films  $\text{C}_2\text{A}_{n-1}\text{Pb}_n\text{X}_{3n+1}$  respectively, where A denotes small organic cation or  $\text{Cs}^+$  cation, C denotes bulky organic cation, and X denotes halide anion. For 2D and quasi-2D materials with Dion-Jacobson rather than Ruddlesden-Popper structure, the corresponding formulae are  $\text{CPbX}_4$  and  $\text{CA}_{n-1}\text{Pb}_n\text{X}_{3n+1}$  respectively. Label QD/NC denotes quantum dots/nanocrystals.  $V_{\text{on}}$  denotes turn-on voltage,  $\text{EQE}_{\text{max}}$  denotes maximum EQE,  $L_{\text{max}}$  denotes maximum luminance,  $\lambda$  denotes emission wavelength,  $T_{50}$  denotes operational lifetime at 100  $\text{cd/m}^2$  (unless specified otherwise). Data for both the best and control devices are included where available.

| Device                 | $V_{\text{on}}$ (V)                  | $L_{\text{max}}$ ( $\text{cd/m}^2$ )                    | $\text{EQE}_{\text{max}}$ (%)                       | $\lambda$ (nm)                                                | $T_{50}$                                                                                        | Ref. |
|------------------------|--------------------------------------|---------------------------------------------------------|-----------------------------------------------------|---------------------------------------------------------------|-------------------------------------------------------------------------------------------------|------|
| Conv, H, Quasi-2D      | 3                                    | 54000                                                   | 22.2                                                | ~530                                                          | 53 min                                                                                          | S62  |
| Conv, H, Quasi-2D      | 3                                    | 49000                                                   | 17                                                  | ~530                                                          | 26 min                                                                                          | S62  |
| Conv, I, NC            | 2.6                                  | ~10000                                                  | 16.4                                                | 523                                                           | 3578 min                                                                                        | S63  |
| Conv, I, NC            | 2.6                                  | ~10000                                                  | 8.5                                                 | ~520                                                          | 25 min                                                                                          | S63  |
| Conv, H, NC            | ~2.7                                 | ~10000                                                  | 23.26                                               | 530                                                           | 64 min                                                                                          | S64  |
| Conv, H, NC            | 2.75                                 | ~10000                                                  | 23.12                                               | 530                                                           | ***                                                                                             | S64  |
| Conv, H, 3D & SC       | ~2.5 (3D), ~5 (1.5 $\mu\text{m}$ SC) | 84,000 (1.5 $\mu\text{m}$ ), 64500 (4.4 $\mu\text{m}$ ) | 11.2 (1.5 $\mu\text{m}$ ), 6.4 (4.4 $\mu\text{m}$ ) | 522 3D, 532 SC (1.5 $\mu\text{m}$ ), 551 (4.4 $\mu\text{m}$ ) | 12500 h (1.5 $\mu\text{m}$ SC), 8650 h (4.4 $\mu\text{m}$ ), 0.78 h (3D 50 nm)                  | S65  |
| Conv, H, quasi-2D      | 3.0                                  | 17185 $\text{cd/m}^2$                                   | 18.64                                               | 530                                                           | 2497 s (41.6 min)                                                                               | S66  |
| Conv, H, quasi-2D      | 3.4                                  | 3673 $\text{cd/m}^2$                                    | 11.68                                               | 529                                                           | 410 s                                                                                           | S66  |
| Conv, H, 3D            | 2.7                                  | 14000                                                   | 20.3                                                | 525                                                           | 104.56 h extrapolated, 46 h measured                                                            | S67  |
| Conv, H, 3D            | ~2.75                                | ***                                                     | ***                                                 | 522                                                           | ***                                                                                             | S67  |
| Conv, H, quasi-2D      | 2.8                                  | 17196.7                                                 | 14.4                                                | 531                                                           | 10.84 h                                                                                         | S68  |
| Conv, H, quasi-2D      | 3.2                                  | 9724.7                                                  | 2.79                                                | 531                                                           | 58 min                                                                                          | S68  |
| Conv, H, quasi-2D      | 2.5                                  | 11370                                                   | 32.1                                                | 516                                                           | 3.56 h                                                                                          | S69  |
| Conv, H, quasi-2D      | 2.8                                  | 6223                                                    | 18.2                                                | 516                                                           | 1.37 h                                                                                          | S69  |
| Conv, I, QD            | 2                                    | 41900                                                   | 21.63                                               | 520                                                           | 752 h estimated, 180.1 h measured                                                               | S70  |
| Conv, I, QD            | 3.1                                  | 25000                                                   | ~17                                                 | ~520                                                          | 9.5 h                                                                                           | S70  |
| Inv, H, 3D             | 2.5                                  | 55370                                                   | 12.98                                               | 569                                                           | 173 h                                                                                           | S71  |
| Inv, H, 3D             | 3.1                                  | 6426                                                    | 2.58                                                | 475                                                           | 16 h                                                                                            | S71  |
| Conv, H, quasi-2D      | 2.68                                 | ~30000                                                  | 24.4                                                | ~515                                                          | 51 min                                                                                          | S72  |
| Conv, H, quasi-2D      | 2.82                                 | ~30000                                                  | 19.4                                                | ~515                                                          | 9 min                                                                                           | S72  |
| Conv, H, 3D            | 2.77                                 | 36656                                                   | 4.23                                                | ~540                                                          | 14 h                                                                                            | S73  |
| Conv, H, 3D            | 3                                    | 46920                                                   | 2.5                                                 | ~540                                                          | 38 min                                                                                          | S73  |
| Conv, I, QD            | ~2.4                                 | 11000                                                   | 18.7                                                | 516                                                           | 15.8 h                                                                                          | S74  |
| Conv, I, QD            | ~2.4                                 | 7000                                                    | 7.7                                                 | 516                                                           | 1.4 min                                                                                         | S74  |
| Conv, H, core-shell NC | 2.22                                 | 473990                                                  | 28.9                                                | 540                                                           | >30000 h at 100 $\text{cd/m}^2$ , 520 h at 1000 $\text{cd/m}^2$ , 14 h at 10000 $\text{cd/m}^2$ | S75  |
| Conv, H, core-shell NC | ~2.56                                | ~10000                                                  | ~5                                                  | 540                                                           | 0.2 h                                                                                           | S75  |

|                   |      |          |       |      |                                                                      |     |
|-------------------|------|----------|-------|------|----------------------------------------------------------------------|-----|
| Conv, I, 3D       | 2.8  | 16436    | 9.4   | 517  | 250 h                                                                | S76 |
| Conv, I, 3D       | 2.5  | 8628     | 1.2   | 517  | 15 h                                                                 | S76 |
| Conv, H, quasi-2D | ~2.5 | 147872.8 | 29.5  | ~518 | 18.67 at 12000 cd/m <sup>2</sup> , 50317 h at 100 cd/m <sup>2</sup>  | S77 |
| Conv, H, quasi-2D | ~2.7 | ~15000   | 12.5  | ~518 | 0.67 h                                                               | S77 |
| Conv, H, quasi-2D | 3.5  | 45230    | 14.0  | 520  | 33 h at 100                                                          | S78 |
| Conv, H, quasi-2D | 3.5  | 26,700   | 4.5   | 519  | 11 min                                                               | S78 |
| Conv, H, quasi-2D | ~2.6 | 17320    | 21.4  | 520  | 117 min                                                              | S79 |
| Conv, H, quasi-2D | ~3   | ~1300    | ~5.8  | 520  | 29 min                                                               | S79 |
| Conv, H, quasi-2D | 2.8  | 13400    | 20.5  | 512  | 25 min                                                               | S80 |
| Conv, H, quasi-2D | ~2.7 | 6094     | 6.37  | 512  | ~12.5 min                                                            | S80 |
| Conv, H, quasi-2D | ~3   | 5200     | 12.4  | 527  | 1.5 h                                                                | S81 |
| Conv, H, quasi-2D | ~4   | 500      | 3.4   | 530  | 1.5 h                                                                | S81 |
| Conv, H, quasi-2D | ~2.7 | 82480    | 20.36 | 526  | 358 min                                                              | S82 |
| Conv, H, quasi-2D | ~2.7 | 19995    | 19.11 | 520  | 142 min                                                              | S82 |
| Conv, H, quasi-2D | ~3   | 133560   | 23.15 | 530  | 74.7 min at ~1000 cd/m <sup>2</sup>                                  | S83 |
| Conv, H, quasi-2D | ~3.1 | ~90000   | 17.4  | ~530 | 41.5 min at ~1000 cd/m <sup>2</sup>                                  | S83 |
| Conv, H, quasi-2D | ~2.7 | 47719    | 21    | 514  | 14 min at 1000 cd/m <sup>2</sup>                                     | S84 |
| Conv, H, quasi-2D | ~2.8 | ~40000   | 15.3  | ~514 | 1.4 min                                                              | S84 |
| Conv, H, quasi-2D | ~2.9 | 288798   | 25.9  | 530  | 91.1 min                                                             | S85 |
| Conv, H, quasi-2D | ~3.1 | ~80000   | 16.8  | ~530 | 27.8 min                                                             | S85 |
| Inv, H, 3D        | 2.0  | 33996    | 9.99  | 534  | 6.3 h                                                                | S86 |
| Inv, H, 3D        | 2.5  | 5495     | 0.34  | 534  | ~30 min                                                              | S86 |
| Inv, H, 3D        | 2.1  | 128337   | 20.5  | 536  | 26.4 min at 10986 cd/m <sup>2</sup>                                  | S87 |
| Inv, H, 3D        | ~3   | ~300     | 0.008 | 542  | ***                                                                  | S87 |
| Conv, H, quasi-2D | ~2.6 | ~1000    | 13.14 | 525  | 148 s at 50 cd/m <sup>2</sup>                                        | S88 |
| Conv, H, quasi-2D | ~3.4 | ~800     | 9.47  | 525  | 91 s at 50 cd/m <sup>2</sup>                                         | S88 |
| Conv, H, quasi-2D | 2.8  | 14428    | 21.36 | 512  | 47 min at 1000 cd/m <sup>2</sup> , 1486 min at 100 cd/m <sup>2</sup> | S89 |
| Conv, H, quasi-2D | 2.8  | 17573    | 14.09 | 512  | ~11.7 min                                                            | S89 |
| Conv, H, quasi-2D | ~3   | 17160    | 14.7  | 512  | 8612 s (2.4 h)                                                       | S90 |
| Conv, H, quasi-2D | ~3   | 10290    | 4.26  | 512  | 1276 s (12.26 min)                                                   | S90 |

|                   |      |          |       |      |                                                                        |      |
|-------------------|------|----------|-------|------|------------------------------------------------------------------------|------|
| Conv, H, quasi-2D | 2.6  | 29860    | 21.5  | 512  | 2.81 h (DC), 4.12 h (100 kHz), 3.62 h (3 MHz)                          | S91  |
| Conv, H, quasi-2D | 3    | 9109     | 10.2  | 510  | 0.52 h (DC), 1.27 h (100 kHz), 0.98 h (3 MHz)                          | S91  |
| Conv, H, quasi-2D | 2.7  | 245375.4 | 27.13 | ~515 | 76.5 min                                                               | S92  |
| Conv, H, quasi-2D | 3    | 164259.6 | 18.61 | ~512 | 39.7 min                                                               | S92  |
| Conv, H, quasi-2D | 2.8  | ~20000   | 17.6  | 525  | 67.8 min at 100 cd/m <sup>2</sup> , 55 s at 1771 cd/m <sup>2</sup>     | S93  |
| Conv, H, quasi-2D | ~3.2 | ~11000   | ~7    | 525  | 54.5 min                                                               | S93  |
| Conv, I, 3D       | 2.4  | 10050    | 22.3  | 527  | 59 h at 130 cd/m <sup>2</sup>                                          | S94  |
| Conv, I, 3D       | ***  | ***      | ***   | ***  | ***                                                                    | S94  |
| Conv, I, QD       | ~2   | 33009    | 24.13 | 517  | 54 min at 10000 cd/m <sup>2</sup> , 2706 min at 1000 cd/m <sup>2</sup> | S95  |
| Conv, I, QD       | ***  | ***      | ***   | ***  | ***                                                                    | S95  |
| Conv, I, NC       | ~2.2 | 47927    | 17.3  | 521  | 123 min at 1000 cd/m <sup>2</sup> , 47.4 h at 100 cd/m <sup>2</sup>    | S96  |
| Conv, I, NC       | ~2.2 | 30653    | 12.5  | 521  | 28 min                                                                 | S96  |
| Conv, H, quasi-2D | ~3.5 | 9363     | 14.4  | ~518 | 341 min                                                                | S97  |
| Conv, H, quasi-2D | ~3   | 7349     | 10.9  | ~518 | 105 min                                                                | S97  |
| Conv, H, quasi-2D | ~3V  | 80000    | 24.5  | 511  | 16 min at 500 cd/m <sup>2</sup>                                        | S98  |
| Conv, H, quasi-2D | ~3V  | 70687    | 15.3  | 512  | 3 min                                                                  | S98  |
| Conv, H, quasi-2D | ~2.7 | 59119    | 18.8  | 513  | 185 min                                                                | S99  |
| Conv, H, quasi-2D | ~2.8 | ~30000   | 13.6  | 513  | ~150 min                                                               | S99  |
| Conv, H, quasi-2D | ~3   | 32556    | 30.84 | 524  | 100.6 min                                                              | S100 |
| Conv, H, quasi-2D | ~3   | 37660    | 17.8  | 524  | 13.8 min                                                               | S100 |
| Conv, I, QD       | ~2.1 | 50537    | 20.3  | 518  | 127 h                                                                  | S101 |
| Conv, I, QD       | ~2.1 | ~10000   | 15.74 | 518  | 9.3 h                                                                  | S101 |
| Conv, H, 3D       | 2.6  | 190000   | 22.3  | 530  | 18.6 min at 138 cd/m <sup>2</sup>                                      | S102 |
| Conv, H, 3D       | ~2.6 | ~40000   | 3.55  | 530  | ***                                                                    | S102 |
| Conv, H, NC       | 3.8  | 67115    | 19.2  | 532  | 20 min                                                                 | S103 |
| Conv, H, NC       | 4.2  | 19377    | 13.3  | 531  | 11 min                                                                 | S103 |
| Conv, I, 3D       | ~2.1 | 327932   | 13.7  | 524  | 157 min                                                                | S104 |
| Conv, I, 3D       | ~3.7 | ~3000    | 0.02  | 521  | 26.33 min                                                              | S104 |
| Conv, H, quasi-2D | ~2.7 | 20230    | 26.5  | 516  | 213 min                                                                | S105 |
| Conv, H, quasi-2D | ~2.8 | 8751     | 15.9  | 516  | 52.2 min                                                               | S105 |
| Conv, H, 3D       | 2.6  | 54234    | 24.2  | 536  | 45.6 h                                                                 | S106 |
| Conv, H, 3D       | 3    | ~15000   | 10.2  | 536  | 8.8 h                                                                  | S106 |
| Conv, H, quasi-2D | 2.8  | 23657    | 23.9  | 530  | 70 min                                                                 | S107 |

|                     |        |                        |                      |                    |                                                                                                                                                |      |
|---------------------|--------|------------------------|----------------------|--------------------|------------------------------------------------------------------------------------------------------------------------------------------------|------|
| Conv, H, quasi-2D   | ~2.8   | ~10000                 | 20.3                 | 530                | 30 min                                                                                                                                         | S107 |
| Conv, H, quasi-2D   | 2.75   | ~20000                 | 16.7                 | 514                | 35 min at 200 cd/m <sup>2</sup> ,                                                                                                              | S108 |
| Conv, H, quasi-2D   | ~3     | ~18000                 | 1.5                  | 514                | 10 min                                                                                                                                         | S108 |
| Conv, H, quasi-2D   | ~2.5 V | 32400                  | 10.3                 | 515                | 87 min at 300 cd/m <sup>2</sup> , 9.5 h at 100 cd/m <sup>2</sup>                                                                               | S109 |
| Conv, H, quasi-2D   | ~2.5 V | 1363                   | 2.5                  | 515                | 4.4 min                                                                                                                                        | S109 |
| Conv, H, quasi-2D   | 2.8    | 4016                   | 20.13                | 516                | 61 min at 150 cd/m <sup>2</sup>                                                                                                                | S110 |
| Conv, H, quasi-2D   | 2.8    | 4016                   | 11.26                | 516                | 21 min                                                                                                                                         | S110 |
| Conv, H, quasi-2D   | 2.9    | 9207                   | 18.9                 | 530                | 39 min                                                                                                                                         | S111 |
| Conv, H, quasi-2D   | 2.8    | 4195                   | 12.71                | 530                | ~11.7 min                                                                                                                                      | S111 |
| Conv, H, quasi-2D   | ~2.8   | 52000                  | 25.6                 | 517                | 115 min at 7200 cd/m <sup>2</sup>                                                                                                              | S112 |
| Conv, H, quasi-2D   | ~2.9   | ~20000                 | 10.7                 | 517                | ~8 min                                                                                                                                         | S112 |
| Conv, H, 3D         | 2.6    | ~23000                 | 23.4                 | 531                | 132 min at 100 cd/m <sup>2</sup> , 7 min at 1000 cd/m <sup>2</sup>                                                                             | S113 |
| Conv, H, 3D         | ~2.6   | ~10000                 | ~12                  | ~531               | 25 min                                                                                                                                         | S113 |
| Conv, H, quasi-2D   | 3.2    | 36500                  | 28.1                 | 514                | 4.04 h                                                                                                                                         | S114 |
| Conv, H, quasi-2D   | 2.8    | 32968.9                | 17.8                 | 514                | 1.44 h                                                                                                                                         | S114 |
| Conv, H, quasi-2D   | ~2.8   | ~20000                 | 22.8                 | 512                | 31 min.                                                                                                                                        | S115 |
| Conv, H, quasi-2D   | ~2.8   | ~20000                 | 14.7                 | 512                | 6.2 min                                                                                                                                        | S115 |
| Conv, H, quasi-2D   | ~2.8   | 4650.5                 | 19.9                 | 517                | 855 s                                                                                                                                          | S116 |
| Conv, H, quasi-2D   | ~2.8   | 4012.5                 | 13.87                | 517                | 612 s                                                                                                                                          | S116 |
| Conv, H, quasi-2D   | 2.8    | 12252                  | 15.47                | ~530               | ~28 min at 106 cd/m <sup>2</sup>                                                                                                               | S117 |
| Conv, H, quasi-2D   | 3.2    | 8580                   | 9.28                 | ~530               | ~13 min at 106 cd/m <sup>2</sup>                                                                                                               | S117 |
| Conv, I, QD         | 2.41   | 43883.39               | 8.54                 | 517                | 63.84 min                                                                                                                                      | S118 |
| Conv, I, QD         | ~2.42  | 7308                   | 2.26                 | 517                | 11.82 min                                                                                                                                      | S118 |
| Conv, H & I, 3D-MOF | ~3.8   | 120000 (MA), 9000 (Cs) | 15.96 (MA), 5.6 (Cs) | 524 (MA), 518 (Cs) | MA: 40 h at 150 cd/m <sup>2</sup> , 498 min at 5000 cd/m <sup>2</sup> , Cs: 50 h at 700 cd/m <sup>2</sup> , 48 min at 9000 cd/m <sup>2</sup> , | S119 |
| Conv, H & I, 3D-MOF | ***    | ***                    | ***                  | ***                | ***                                                                                                                                            | S119 |
| Conv, I, NC         | 2.7    | 2030                   | 19.3                 | 511                | 50 s at 1000 cd/m <sup>2</sup> , 25 min at 100 cd/m <sup>2</sup>                                                                               | S120 |
| Conv, I, NC         | ~4     | ~500                   | 0.13                 | 511                | 12 s                                                                                                                                           | S120 |
| Conv, H, 3D         | ~1.9   | ~100000                | 8.87                 | ~521               | ***                                                                                                                                            | S121 |
| Conv, H, 3D         | 2      | 316536                 | 21.2                 | 528                | ~4900h at 100 cdm <sup>-2</sup>                                                                                                                | S122 |
| Conv, H, 3D         | ~2.2   | ~15000                 | 1.5                  | 528                | 0.7 h                                                                                                                                          | S122 |

**Table S3.** Performance parameters of LEDs in the red spectral region. Letters Conv and Inv denote conventional and inverted architecture, respectively. Perovskite emitters are labelled as H and I for hybrid organic and inorganic, respectively, while the dimensionality is denoted as 3D, 2D, and quasi-2D for 3D films  $\text{APbX}_3$ , 2D films  $\text{C}_2\text{PbX}_4$ , and quasi-2D films  $\text{C}_2\text{A}_{n-1}\text{Pb}_n\text{X}_{3n+1}$  respectively, where A denotes small organic cation or  $\text{Cs}^+$  cation, C denotes bulky organic cation, and X denotes halide anion. For 2D and quasi-2D materials with Dion-Jacobson rather than Ruddlesden-Popper structure, the corresponding formulae are  $\text{CPbX}_4$  and  $\text{CA}_{n-1}\text{Pb}_n\text{X}_{3n+1}$  respectively. Label QD/NC denotes quantum dots/nanocrystals.  $V_{\text{on}}$  denotes turn-on voltage,  $\text{EQE}_{\text{max}}$  denotes maximum EQE,  $L_{\text{max}}$  denotes maximum luminance,  $\lambda$  denotes emission wavelength,  $T_{50}$  denotes operational lifetime at  $100 \text{ cd/m}^2$  (unless specified otherwise).

| Device            | $V_{\text{on}}$ (V) | $L_{\text{max}}$ ( $\text{cd/m}^2$ ) | $\text{EQE}_{\text{max}}$ (%) | $\lambda$ (nm) | $T_{50}$                 | Ref. |
|-------------------|---------------------|--------------------------------------|-------------------------------|----------------|--------------------------|------|
| Conv, I, 3D       | 3                   | 1000                                 | 2                             | ~655           | 10h                      | S123 |
| Conv, H, quasi-2D | 3.1                 | 1308                                 | 15.7                          | ~631           | 30min                    | S124 |
| Conv, H, 3D       | 1.5                 | 1475.69                              | 13.52                         | 664            | 1099sec                  | S125 |
| Conv, I, 3D       | 2.6                 | 3100                                 | 21.2                          | 666            | 4806.7h                  | S126 |
| Inv, H, NC        | 2                   | 1258                                 | ~3.39                         | 680            | ***                      | S127 |
| Inv, H, 3D        | 3.3                 | 8547                                 | 8.7                           | 662            | 8h                       | S128 |
| Conv, I, QD       | 3.2                 | 1212                                 | 6.4                           | 630            | 78 min                   | S129 |
| Conv, H, quasi-2D | 2.7                 | 2410                                 | 18.3                          | 630            | 540 min                  | S130 |
| Conv, H, quasi-2D | 2.8                 | 1452                                 | 12.4                          | 635            | 2.21h                    | S131 |
| Conv, H, quasi-2D | ~3                  | 6483                                 | 20.73                         | 656            | 71 min                   | S132 |
| Conv, H, quasi-2D | ~3.5                | 404.2                                | 21.8                          | 682            | ~6h                      | S133 |
| Conv, I, quasi-2D | ~2.3                | 100                                  | 8.16                          | 655            | 1175 s                   | S134 |
| Conv, H, quasi-2D | 2V                  | 1701                                 | 16.1                          | 625            | 56.4 min                 | S135 |
| Inv, I, QD        | 1.5                 | 3691                                 | 15.24                         | 695            | 220 min                  | S136 |
| Conv, I, 3D       | 2.8                 | 4258                                 | 9.93                          | 666            | 2667 h                   | S137 |
| Conv, H, quasi-2D | 2.4                 | 85.6                                 | 21.6                          | 694            | 1000 s                   | S138 |
| Inv, H, 3D        | 1.9                 | 11592                                | 14.06                         | 671.6          | 15.4 h                   | S139 |
| Conv, I, NC       | ~3.8                | 618                                  | 17.8                          | 690            | 317 h                    | S140 |
| Conv, I, QD       | 2.2                 | 1200                                 | 25.2                          | 632            | 120 min                  | S141 |
| Conv, I, QD       | 2.99                | 1391                                 | 7.1                           | 634            | 33 min                   | S142 |
| Conv, I, NC       | 3.6                 | 2671                                 | 3.55                          | 637            | 50 min                   | S143 |
| Conv, H, quasi-2D | ~2.9                | 2377                                 | 18.7                          | 650            | 476 min                  | S144 |
| Conv, I, NC       | 3                   | 2500                                 | 23.6                          | 676n           | 2500 min                 | S145 |
| Conv, I, QD       | ~2.5                | 807                                  | 16.3                          | 633            | ~10                      | S146 |
| Conv, I, NC       | ~2.5                | ~5000                                | 12.6                          | 630            | 312 min                  | S147 |
| Inv, I, quasi-2D  | 1.55                | 10031                                | 18.8                          | 691            | 50.3 h                   | S148 |
| Conv, H, NC       | 2.8                 | 627                                  | 20.28                         | 627            | 340 min                  | S149 |
| Conv, H, 3D       | ~1.9                | ~ $10^3$                             | 20.29                         | 630            | 27. h                    | S150 |
| Conv, H, 2D       | ~1.5                | 380                                  | 4.97                          | 632            | >15h                     | S151 |
| Conv, I, 3D       | 2.2                 | 9000                                 | 17.8                          | 638            | 40 min                   | S152 |
| Conv, H, 2D       | 2.4                 | 98.7                                 | 1.87                          | 633            | ***                      | S153 |
| Inv, H, 3D        | 2.7                 | 8777                                 | 8.21                          | 650            | 491 h                    | S154 |
| Conv, I, QD       | ~2.2                | 3120.5                               | 23.2                          | 633            | 44.7 min                 | S155 |
| Conv, I, QD       | ~2                  | 7,000                                | 21                            | 636            | $T_{90}=500 \text{ min}$ | S156 |



**Table S4.** Performance parameters of LEDs in the NIR spectral region. Letters Conv and Inv denote conventional and inverted architecture, respectively. Perovskite emitters are labelled as H and I for hybrid organic and inorganic, respectively, while the dimensionality is denoted as 3D, 2D, and quasi-2D for 3D films  $\text{APbX}_3$ , 2D films  $\text{C}_2\text{PbX}_4$ , and quasi-2D films  $\text{C}_2\text{A}_{n-1}\text{Pb}_n\text{X}_{3n+1}$  respectively, where A denotes small organic cation or  $\text{Cs}^+$  cation, C denotes bulky organic cation, and X denotes halide anion. For 2D and quasi-2D materials with Dion-Jacobson rather than Ruddlesden-Popper structure, the corresponding formulae are  $\text{CPbX}_4$  and  $\text{CA}_{n-1}\text{Pb}_n\text{X}_{3n+1}$  respectively. Label QD/NC denotes quantum dots/nanocrystals.  $V_{\text{on}}$  denotes turn-on voltage,  $\text{EQE}_{\text{max}}$  denotes maximum EQE,  $L_{\text{max}}$  denotes maximum luminance,  $\lambda$  denotes emission wavelength,  $T_{50}$  denotes operational lifetime.

| Device            | $V_{\text{on}}$<br>(V) | Radiance<br>( $\text{W Sr}^{-1}\text{m}^{-2}$ ) | $\text{EQE}_{\text{max}}$<br>(%) | $\lambda$<br>(nm) | $T_{50}$                                                            | Ref. |
|-------------------|------------------------|-------------------------------------------------|----------------------------------|-------------------|---------------------------------------------------------------------|------|
| Inv, H, 3D        | ~1.4                   | 17                                              | 18.6                             | 802               | 682h                                                                | S157 |
| Inv, H, 3D        | 1.3                    | 378                                             | 16.9                             | 761               | 25.8h                                                               | S158 |
| Inv, H, 3D        | ~1.2                   | 17.65                                           | ~13                              | 802               | 100.05h                                                             | S159 |
| Conv, H, 3D       | ~1.55                  | 157                                             | 10.7                             | ~760              | 15.5min at $50\text{mA}/\text{cm}^2$                                | S160 |
| Inv, H, 3D        | ~1.3                   | 626.94                                          | 15.84                            | ~790              | >60h at $10\text{mA}/\text{cm}^2$                                   | S161 |
| Conv, H, 3D       | ~2                     | 2555                                            | 16.4                             | ~760              | 117min                                                              | S162 |
| Inv, H, 3D        | ~1.3                   | 964                                             | 23.6                             | 802               | 106.1h                                                              | S163 |
| Inv, H, 3D        | ~1.3                   | 110                                             | 24.3                             | 793               | 1126.3h<br>at $5\text{mA}/\text{cm}^2$                              | S164 |
| Conv, H, 3D       | 1                      | 399                                             | 11.4                             | 759               | 525h at $50\text{mA}/\text{cm}^2$                                   | S165 |
| Inv, H, quasi-2D  | ~1.9                   | 175.6                                           | 21.6                             | 790               | 90h                                                                 | S166 |
| Inv, H, quasi-2D  | ***                    | 142.4                                           | 21.9                             | ~794              | 479h at $20\text{mA}/\text{cm}^2$                                   | S167 |
| Inv, H, 3D        | ~2                     | ~80                                             | 4.5                              | ~790              | 20h, 200h under pulsed operation                                    | S168 |
| Inv, H, 3D        | ~1.2                   | ~250                                            | 18.2                             | 787               | $T_{70}=171\text{h}$                                                | S169 |
| Conv, H, 3D       | ~2.2                   | ~1200                                           | 15.6                             | 752               | ~2h at $10\text{mA}/\text{cm}^2$                                    | S170 |
| Conv, H, 3D       | ***                    | ***                                             | 3.92                             | 787               | 35min at $300\text{mA}/\text{cm}^2$ , 170min under pulsed operation | S171 |
| Inv, H, 3D        | ***                    | 1282.8                                          | 17.5                             | 789               | 130h at $100\text{mA}/\text{cm}^2$                                  | S172 |
| Conv, H, quasi-2D | ~2.7                   | ~20                                             | 10                               | 763               | $T_{90}=5.3\text{h}$ at $5\text{mA}/\text{cm}^2$                    | S173 |
| Inv, H, 3D        | ~1.5                   | 650                                             | 22.2                             | 802               | $T_{80}=14\text{h}$                                                 | S174 |
| Conv, H, quasi-2D | ~3.5                   | ~0.17                                           | 23.2                             | ~740              | 20.8h at $5\text{mA}/\text{cm}^2$ in a $\text{N}_2$ glove-box       | S175 |
| Inv, H, 3D        | 1.3                    | 241                                             | 14.2                             | 802               | 24h                                                                 | S176 |
| Inv, H, 3D        | ~1.1                   | ~200                                            | 17.3                             | 802               | 100h                                                                | S177 |
| Inv, H, 3D        | ~1.5                   | 50.47                                           | 24.1                             | 804               | 110.7h at $10\text{mA}/\text{cm}^2$                                 | S178 |
| Inv, H, 3D        | ~1.5                   | 50.64                                           | 21.39                            | 804               | 174.3h at $10\text{mA}/\text{cm}^2$                                 | S178 |
| Inv, H, 3D        | ~1.2                   | 2.1                                             | 18.5                             | 803               | 32675 h at $3.2\text{mA}/\text{cm}^2$                               | S179 |
| Conv, H, 3D       | ~2                     | 226                                             | 2.4                              | 948               | 39.5h at $100\text{mA}/\text{cm}^2$                                 | S180 |
| Inv, H, 3D        | ~1.3                   | 104                                             | 18.5                             | 805               | 28 min at $100\text{mA}/\text{cm}^2$                                | S181 |
| Inv, H, 3D        | ~1.25                  | 393                                             | 20.2                             | 802               | ~26h                                                                | S182 |
| Inv, H, 3D        | ~1.25                  | 250                                             | 22.2                             | 800               | 19h                                                                 | S183 |
| Conv, H, quasi-2D | 2                      | 89                                              | 11.6                             | ~898              | 23min at $100\text{mA}/\text{cm}^2$                                 | S184 |
| Inv, H, quasi-2D  | ~1.15                  | ~7                                              | 20.1                             | ~790              | 46h                                                                 | S185 |
| Inv, H, 3D        | 1.25                   | 308                                             | 21.4                             | 800               | 20h at $20\text{mA}/\text{cm}^2$                                    | S186 |
| Conv, H, 3D       | ~2.2                   | 12                                              | 8.3                              | ~894              | 3h                                                                  | S187 |
| Inv, H, quasi-2D  | ~1.2                   | 88.5                                            | 5.2                              | 785               | 100h at $25\text{mA}/\text{cm}^2$                                   | S188 |
| Inv, H, quasi-2D  | 1.7                    | 55                                              | 5.8                              | 785               | $T_{87.7}=1848\text{h}$                                             | S189 |
| Inv, H, 3D        | ~1.35                  | 80                                              | ~15                              | 790               | 2.5h at $100\text{mA}/\text{cm}^2$                                  | S190 |
| Conv, H, 3D       | ~2.5                   | ~140                                            | 20.0                             | 763               | 17.1min                                                             | S191 |

## ARTICLE

## Journal Name

|            |      |       |      |     |                                  |      |
|------------|------|-------|------|-----|----------------------------------|------|
| Inv, H, 3D | ~1.2 | ~500  | 19.2 | 802 | 43h at 100 mAcm <sup>-2</sup>    | S192 |
| Inv, H, 3D | ~1.6 | 366.1 | 21.3 | 792 | 190.1h at 20 mA cm <sup>-2</sup> | S193 |
| Inv, H, 3D | ~1.3 | 600   | 22.7 | 781 | 1774h at 20 mAcm <sup>-2</sup>   | S194 |

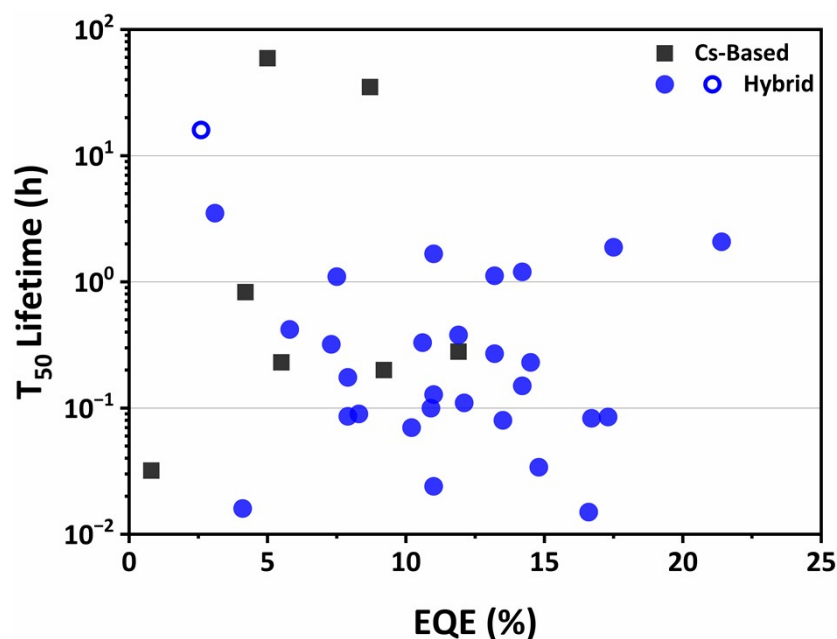

**Figure S1.** Device lifetime as a function of EQE for blue PeLEDs. Open symbols denote inverted architecture, filled symbols denote conventional architecture. In cases where acceleration factor  $n$  is not specified, we assume  $n=1.5$  as a commonly used value in literature and calculate expected lifetime at  $L_0=100 \text{ cd/m}^2$  from the equation  $T_{50} L_n = \text{constant}$ .

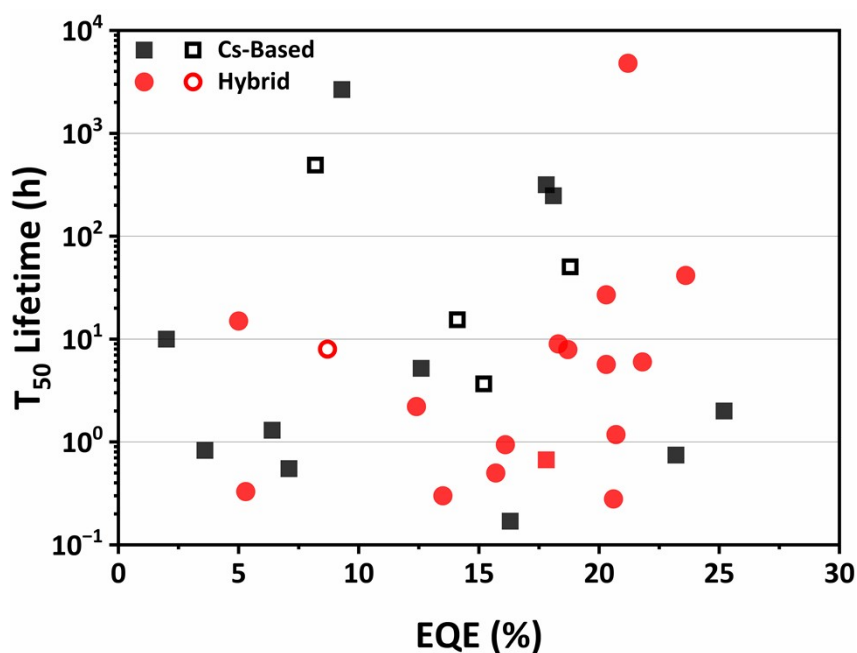

**Figure S2.** Device lifetime as a function of EQE for red PeLEDs. Open symbols denote inverted architecture, filled symbols denote conventional architecture. In cases where acceleration factor  $n$  is not specified, we assume  $n=1.5$  as a commonly used value in literature and calculate expected lifetime at  $L_0=100 \text{ cd/m}^2$  from the equation  $T_{50} L_n = \text{constant}$ .

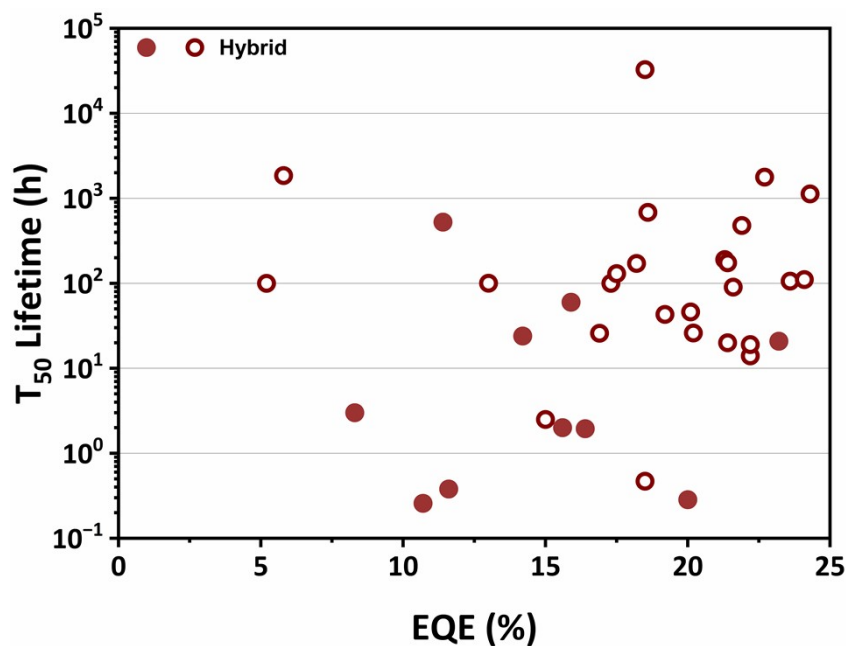

**Figure S3.** Device lifetime as a function of EQE for NIR PeLEDs. Open symbols denote inverted architecture, filled symbols denote conventional architecture.

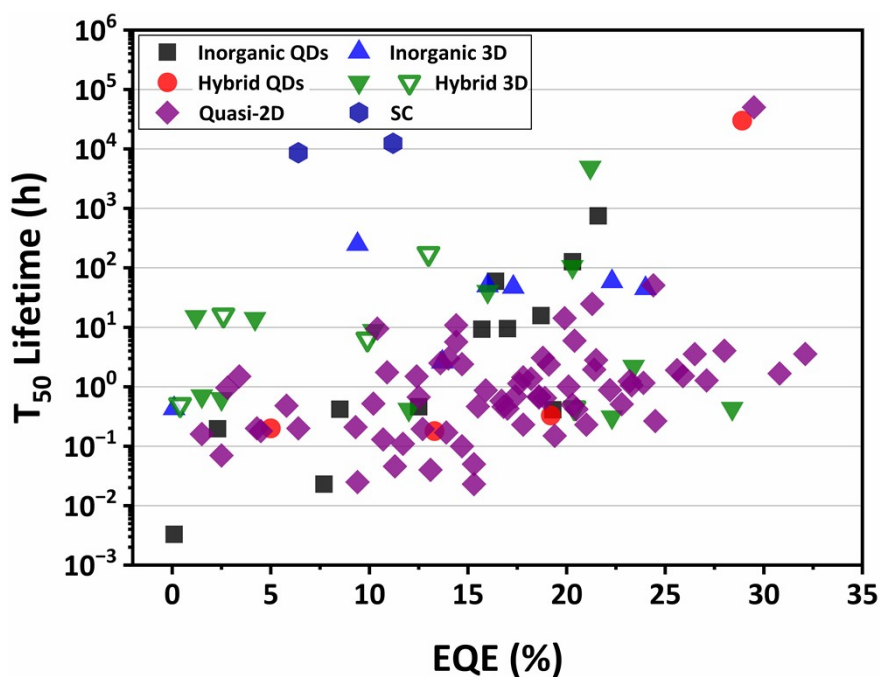

**Figure S4.** Device lifetime as a function of EQE for green PeLEDs. Open symbols denote inverted architecture, filled symbols denote conventional architecture. In cases where acceleration factor  $n$  is not specified, we assume  $n=1.5$  as a commonly used value in literature and calculate expected lifetime at  $L_0=100 \text{ cd/m}^2$  from the equation  $T_{50} L_n = \text{constant}$ .

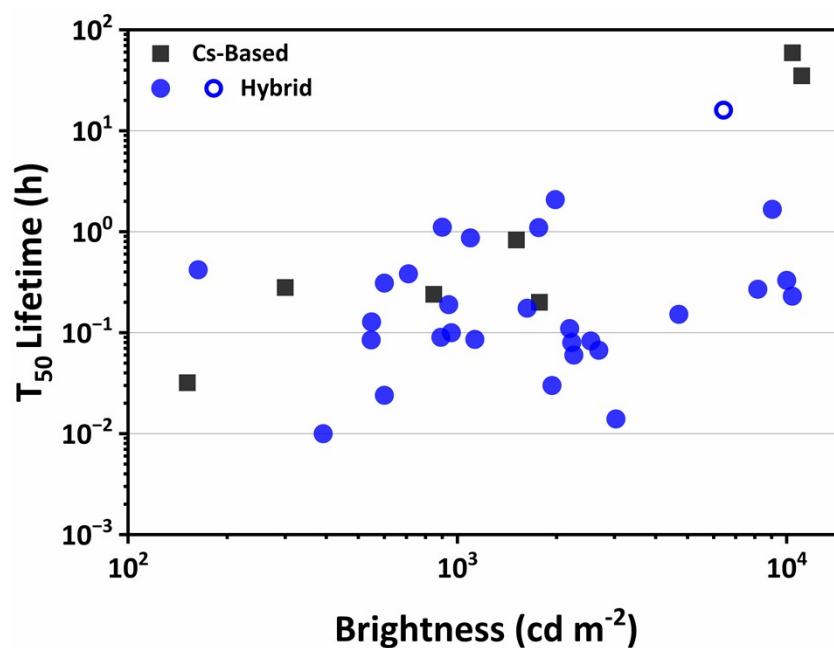

**Figure S5.** Device lifetime as a function of brightness for blue PeLEDs. Open symbols denote inverted architecture, filled symbols denote conventional architecture. In cases where acceleration factor  $n$  is not specified, we assume  $n=1.5$  as a commonly used value in literature and calculate expected lifetime at  $L_0=100 \text{ cd/m}^2$  from the equation  $T_{50} L_n = \text{constant}$ .

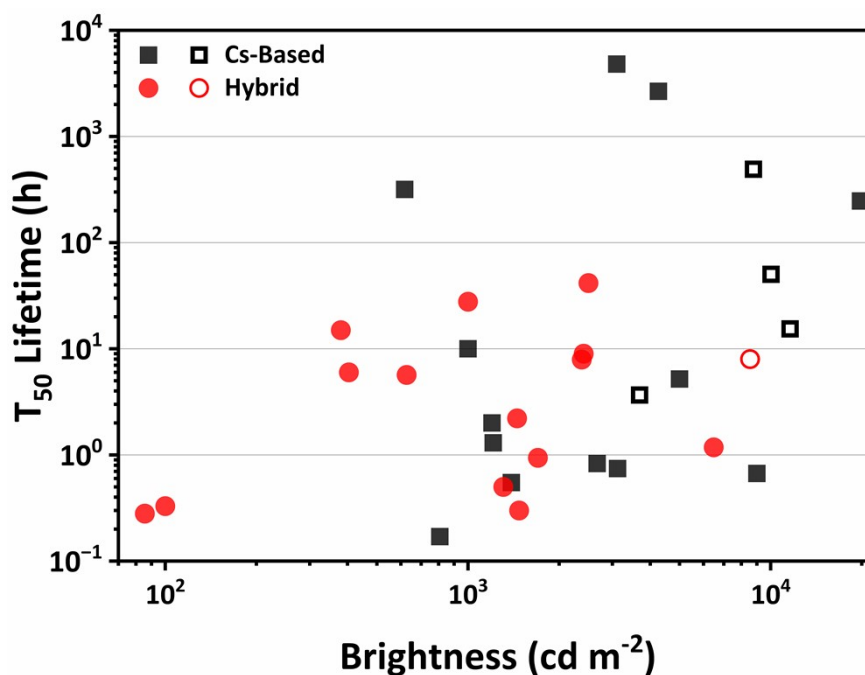

**Figure S6.** Device lifetime as a function of brightness for red PeLEDs. Open symbols denote inverted architecture, filled symbols denote conventional architecture. In cases where acceleration factor  $n$  is not specified, we assume  $n=1.5$  as a commonly used value in literature and calculate expected lifetime at  $L_0=100 \text{ cd/m}^2$  from the equation  $T_{50} L_n = \text{constant}$ .

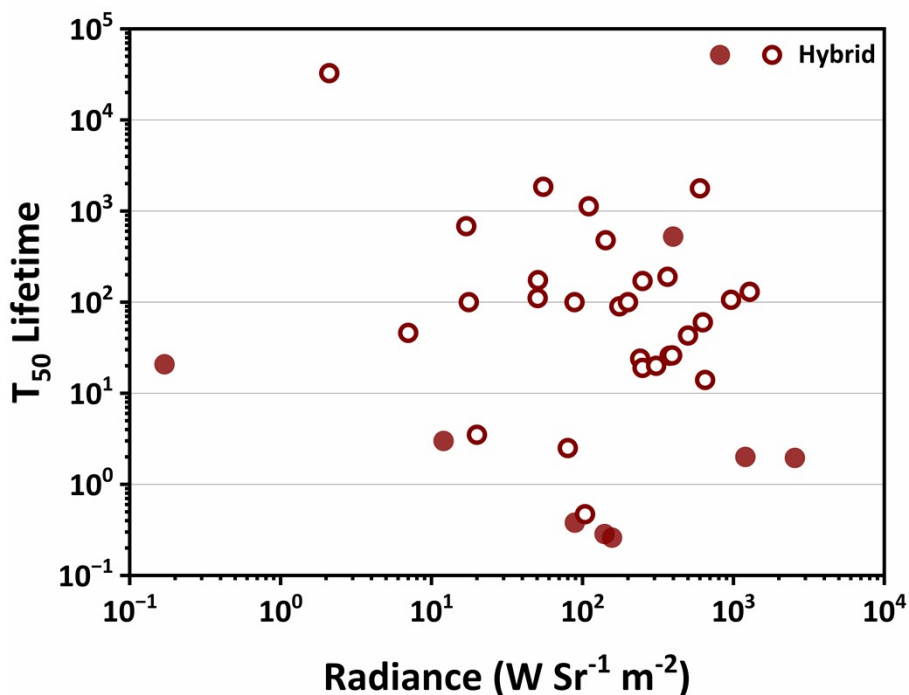

**Figure S7.** Device lifetime as a function of radiance for NIR PeLEDs. Open symbols denote inverted architecture, filled symbols denote conventional architecture.

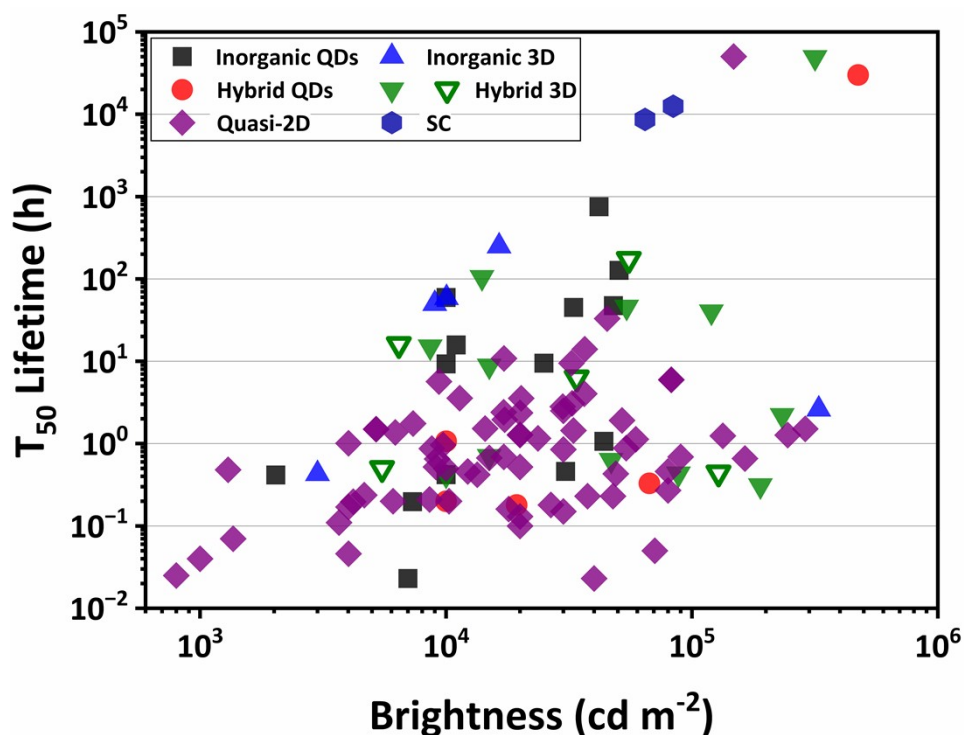

**Figure S8.** Device lifetime as a function of brightness for green PeLEDs. Open symbols denote inverted architecture, filled symbols denote conventional architecture. In cases where acceleration factor  $n$  is not specified, we assume  $n=1.5$  as a commonly used value in literature and calculate expected lifetime at  $L_0=100 \text{ cd/m}^2$  from the equation  $T_{50} L_n = \text{constant}$ .

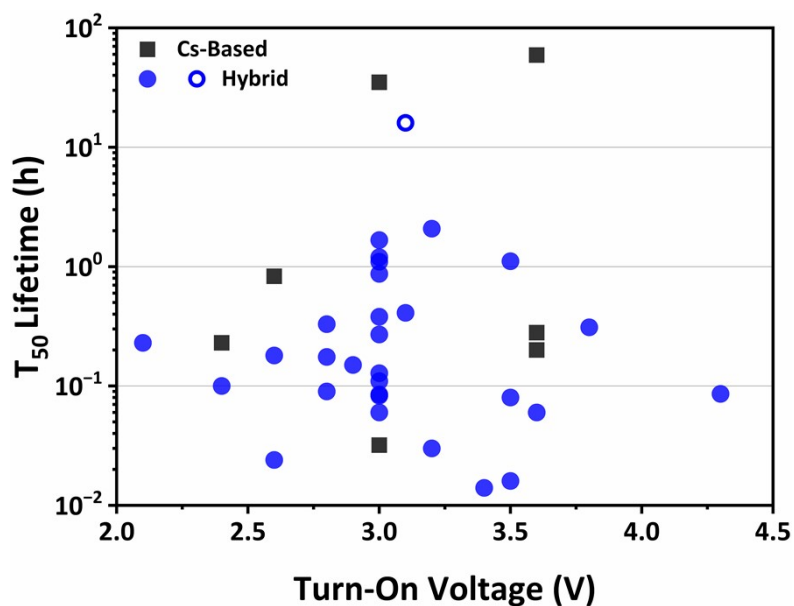

**Figure S9.** Device lifetime as a function of turn-on voltage for blue PeLEDs. Open symbols denote inverted architecture, filled symbols denote conventional architecture. In cases where acceleration factor  $n$  is not specified, we assume  $n=1.5$  as a commonly used value in literature and calculate expected lifetime at  $L_0=100\text{ cd/m}^2$  from the equation  $T_{50} L_n = \text{constant}$ .

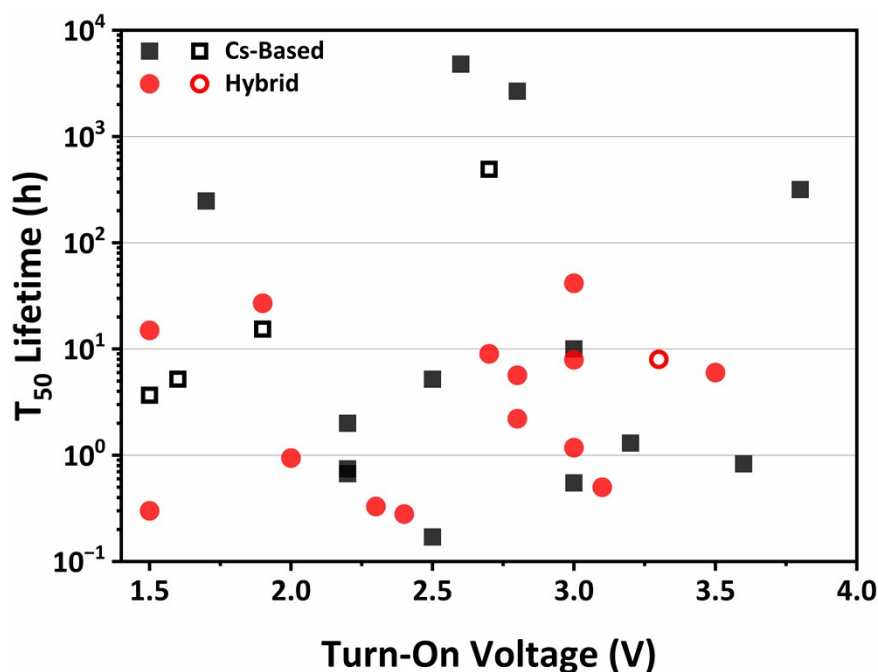

**Figure S10.** Device lifetime as a function of turn-on voltage for red PeLEDs. Open symbols denote inverted architecture, filled symbols denote conventional architecture. In cases where acceleration factor  $n$  is not specified, we assume  $n=1.5$  as a commonly used value in literature and calculate expected lifetime at  $L_0=100\text{ cd/m}^2$  from the equation  $T_{50} L_n = \text{constant}$ .

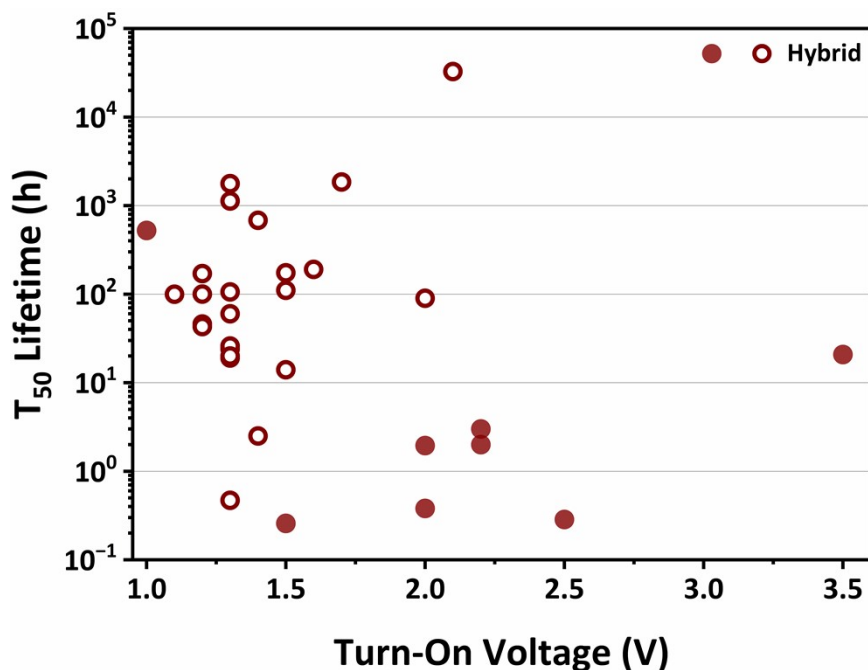

**Figure S11.** Device lifetime as a function of turn-on voltage for NIR PeLEDs. Open symbols denote inverted architecture, filled symbols denote conventional architecture.

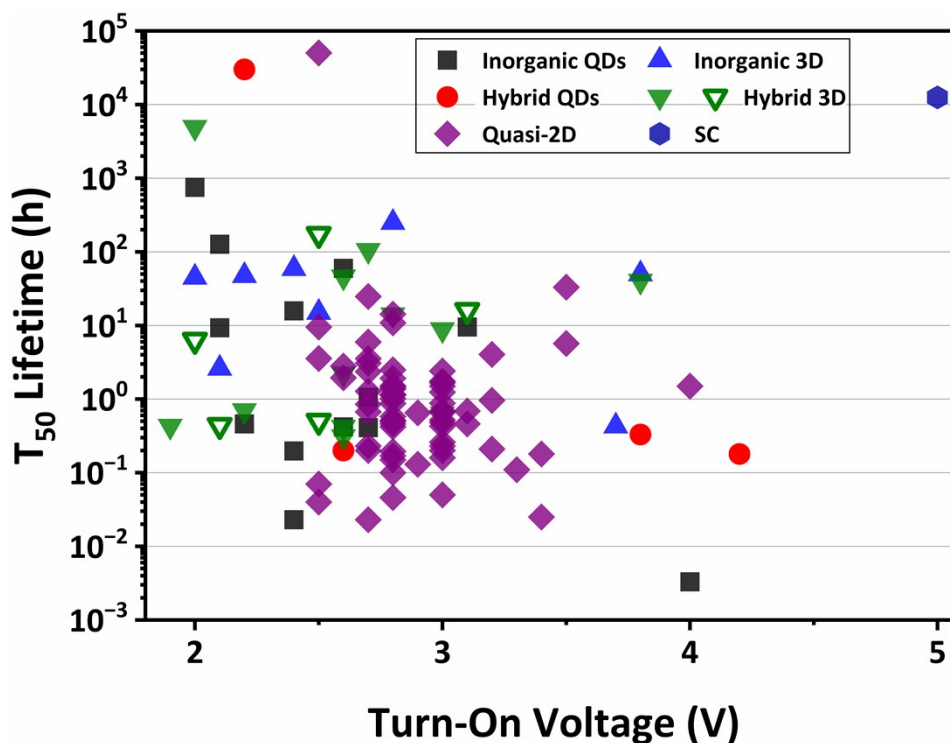

**Figure S12.** Device lifetime as a function of turn-on voltage for green PeLEDs. Open symbols denote inverted architecture, filled symbols denote conventional architecture. In cases where acceleration factor  $n$  is not specified, we assume  $n=1.5$  as a commonly used value in literature and calculate expected lifetime at  $L_0=100 \text{ cd/m}^2$  from the equation  $T_{50} L_n = \text{constant}$ .



## References

- S1. Z. Li, Z. Chen, Z. Shi, G. Zou, L. Chu, X.-K. Chen, C. Zhang, S.K. So, H.-L. Yip, *Nat. Commun.*, 2023, **14**, 6441.
- S2. Z. Chu, W. Zhang, J. Jiang, Z. Qu, F. Ma, Y. Zhao, X. Chu, Y. Shen, Y. Li, Z. Yin, X. Zhang, J. You, *Nat. Electron.*, 2023, **6**, 360-369.
- S3. J. Kim, Y.H. Chu, J. Park, K. Bang, S. Yoon, S. Park, K. Park, J. Kwon, N. Kim, K.T. Yoon, Y. Kim, Y.S. Lee, B. Shin, *ACS Appl. Mater. Interfaces*, 2024, **16**, 6274-6283.
- S4. A.R.B.M. Yusoff, A.E.X. Gavim, A.G. Macedo, W.J. da Silva, F.K. Schneider, M.A.M. Teridi, *Mater. Today Chem.*, 2018, **10**, 104-111.
- S5. C. Wei, W. Su, J. Li, B. Xu, Q. Shan, Y. Wu, F. Zhang, M. Luo, H. Xiang, Z. Cui, H. Zeng, *Adv. Mater.*, 2022, **34**, 2107798.
- S6. Y. Chen, M. Nan, Y. He, S. Lu, W. Shen, G. Cheng, S. Chen, W. Huang, *ACS Appl. Mater. Interfaces*, 2024, **16**, 22139-22146. 10.1021/acsami.4c01824
- S7. N. Zhou, G. Na, D. Li, Z. Jiang, X. Xiao, H. Lin, Z. Zhang, W.C.H. Choy, *Adv. Opt. Mater.*, 2024, 2302273.
- S8. S. Yuan, T. Fang, B. Han, Q. Shan, C. Wei, X. Zheng, X. Li, B. Xu, H. Zeng, *Adv. Funct. Mater.*, 2024, 2316206
- S9. Z. Chu, Y. Zhao, F. Ma, C.-X. Zhang, H. Deng, F. Gao, Q. Ye, J. Meng, Z. Yin, X. Zhang, J. You, *Nat. Commun.*, 2020, **11**, 4165. 10.1038/s41467-020-17943-6
- S10. C. Bi, Z. Yao, J. Hu, X. Wang, M. Zhang, S. Tian, A. Liu, Y. Lu, N.H. de Leeuw, M. Sui, J. Tian, *ACS Energy Lett.* 2023, **8**, 731-739.
- S11. Q. Wang, X. Wang, Z. Yang, N. Zhou, Y. Deng, J. Zhao, X. Xiao, P. Rudd, A. Moran, Y. Yan, J. Huang, *Nat. Commun.*, 2019, **10**, 5633. 10.1038/s41467-019-13580-w
- S12. Z. Yao, C. Bi, A. Liu, M. Zhang, J. Tian, *Nano Energy*, 2022, **95**, 106974.
- S13. S. Yuan, L. Dai, Y. Sun, F. Auras, Y.-H. Zhou, R.-Z. An, Y. Liu, C. Ding, C. Cassidy, X. Tang, S.-C. Dong, H.-B. Kang, K. Chen, X. Liu, Z.-F. Ye, Y. Zhao, C. Adachi, L.-S. Liao, N.C. Greenham, Y. Qi, S.D. Stranks, L.-S. Cui, R.H. Friend, *Nat. Photonics*, 2024, **18**, 425-431. 10.1038/s41566-024-01382-6
- S14. M. Karlsson, Z. Yi, S. Reichert, X. Luo, W. Lin, Z. Zhang, C. Bao, R. Zhang, S. Bai, G. Zheng, P. Teng, L. Duan, Y. Lu, K. Zheng, T. Pullerits, C. Deibel, W. Xu, R. Friend, F. Gao, *Nat. Commun.*, 2021, **12**, 361.
- S15. Y.-K. Wang, F. Jia, X. Li, S. Teale, P. Xia, Y. Liu, P.T.-s. Chan, H. Wan, Y. Hassan, M. Imran, H. Chen, L. Grater, L.-D. Sun, G.C. Walker, S. Hoogland, Z.-H. Lu, C.-H. Yan, L.-S. Liao, E.H. Sargent, *Sci. Adv.*, 2023, **9**, eadh2140.
- S16. G. Yang, X. Tan, L. Zhai, H. Huang, Y. Wang, K. Jiang, Y. Yang, L. Zhang, Z.a. Tan, H. Wen, Y. Xu, C. Zou, *Chem. Commun.*, 2023, **59**, 5906-5909.
- S17. H. Yu, H. Wang, T. Zhang, C. Yi, G. Zheng, C. Yin, M. Karlsson, J. Qin, J. Wang, X.-K. Liu, F. Gao, *J. Phys. Chem. Lett.*, 2021, **12**, 6041-6047.
- S18. Y. S. Shin, Y. J. Yoon, S. H. Kweon, S. H. Oh, C. B. Park, D. Yuk, T. Song, J. G. Son, J. Seo, W. Lee, S. K. Kwak, G.-H. Kim, J. Y. Kim, *Chem. Eng. J.*, 2023, **464**, 142707.
- S19. Y.-Y. Tang, Y. Shen, Y. Yu, K. Zhang, B.-F. Wang, J.-X. Tang, Y.-Q. Li, *Small*, 2024, **20**, 2309309.
- S20. L. Xu, Z. Wu, C. Jiang, M. Liu, B. Li, H. Lin, W. Liu, H. Peng, C. Luo, *Adv. Opt. Mater.*, 2024, **12**, 2301615.
- S21. Z. Qi, L. Yuan, W. Ding, Z. Qin, S. Wang, H. Liu, X. Li, *Small*, 2024, **20**, 2304821.
- S22. L. Shu, B. Han, Q. Zhang, S. Poddar, D. Zhang, Y. Fu, Y.-B. Cao, Y. Ding, Y. Zhu, Y. Lin, D.-B. Kuang, J.-F. Liao, Z. Fan, *Adv. Funct. Mater.*, 2023, **33**, 2306570.
- S23. W.T. Sun, Y. He, M.U. Ali, Q. Liu, H. Mo, S. Wang, A.M.C. Ng, A.B. Djurišić, *J. Mater. Chem. C*, 2023, **11**, 14207-14216.
- S24. Y. Yu, B.-F. Wang, Y. Shen, Z.-H. Su, K. Zhang, H. Ren, Y.-F. Zhang, X. Gao, J.-X. Tang, Y.-Q. Li, *Angew. Chem. Int. Ed.*, 2024, **63**, e202319730.
- S25. J. Luo, L. Yang, Z. Tan, W. Xie, Q. Sun, J. Li, P. Du, Q. Xiao, L. Wang, X. Zhao, G. Niu, L. Gao, S. Jin, J. Tang, *Adv. Mater.*, 2021, **33**, 2101903.
- S26. Y.-H. Zhou, Y.-H. Lou, X.-Q. Wang, K.-L. Wang, J. Chen, C.-H. Chen, Z.-K. Wang, *Adv. Opt. Mater.*, 2022, **10**, 2101655.
- S27. S. Yan, W. Tian, H. Chen, K. Tang, T. Lin, G. Zhong, L. Qiu, X. Pan, W. Wang, *Adv. Opt. Mater.*, 2021, **9**, 2001709.
- S28. Y. Liu, L. Zhang, S. Chen, C. Liu, Y. Li, J. Wu, D. Wang, Z. Jiang, Y. Li, Y. Li, X. Wang, B. Xu, *Small*, 2021, **17**, 2101477.
- S29. F. Wang, Z. Wang, W. Sun, Z. Wang, Y. Bai, T. Hayat, A. Alsaedi, Z.A. Tan, *Small*, 2020, **16**, 2002940.
- S30. Z. Wang, X. Peng, W. Chen, Z. Su, Y. Wang, Z. Diao, C. Qin, L. Niu, X. Gao, X. Yang, *Adv. Funct. Mater.*, 2024, **34**, 2310389.
- S31. J. Seo, K. Wang, A.H. Coffey, G. He, H. Yang, Y.H. Lee, K. Ma, J. Sun, J.Y. Park, H. Zhao, C. Yuan, C. Zhu, M.Y. Sfeir, L. Dou, *Adv. Opt. Mater.*, 2023, **11**, 2301164.
- S32. L. Zhang, Y. Jiang, Y. Feng, M. Cui, S. Li, X. Fu, H.-Y. Hsu, C. Qin, M. Yuan, *Angew. Chem. Int. Ed.*, 2023, **62**, e202302184.
- S33. *Angew. Chem. Int. Ed.* 2023, **62**, e202219255
- S34. C. Shen, Y. Gan, S. Zhang, W. Qiu, J. Li, D. Liu, G. Sun, Z. Liu, G.-X. Yang, X. Peng, S. Shi, M.-D. Li, S.-J. Su, *Laser Photonics Rev.*, 2023, **17**, 2300390.
- S35. Y. Jia, R. Li, Y. Zhou, S. Zhao, H. Yu, J. Wang, Z. Lin, H. Su, N. Zhao, *Small Struct.*, 2023, **4**, 2200393.
- S36. Z. Chen, X.-K. Liu, H. Wang, X. Liu, L. Hou, F. Gao, *Adv. Opt. Mater.*, 2023, **11**, 2202528.
- S37. H. Li, J. Wu, S. Hu, W. Zhang, J. Gao, Y. Guo, P. Guo, C. Liu, G. Zhao, M. Fu, H. Bian, T. Liu, H. Wang, H. Wang, *Adv. Funct. Mater.*, 2023, **33**, 2303787.
- S38. M.-S. Kim, P. Sadhukhan, J.-M. Myoung, *Adv. Funct. Mater.*, 2024, **34**, 2309436.
- S39. L. Zhang, S. Hu, M. Guo, Y. Ren, L. Wei, W. Li, F. Lin, Z. Yang, Z. Yang, C. Liu, B. Liu, *Adv. Mater.*, 2023, **35**, 2302059.
- S40. Y. Liu, S. Wang, Z. Yu, G. Chen, C. Wang, T. Wang, W. Ke, G. Fang, *Adv. Mater.*, 2023, **35**, 2302161.
- S41. C. Zhang, H. Yuan, L. Kong, L. Wang, Y. Wang, Y. Li, Y. Yang, L. Turlyanska, X. Yang, *Adv. Opt. Mater.*, 2023, **11**, 2300147.
- S42. H. Zhao, T. Xuan, W. Bai, H. Dong, G. Dong, R.-J. Xie, *Laser Photonics Rev.*, 2023, **17**, 2300430.
- S43. H. Li, Y. Zhao, J. Lu, J. Feng, J. Zhao, K. Lin, W. Feng, L. Jiang, Z. Wei, Z. Du, Y. Wu, *Small*, 2024, 2308616.

- S44. J. Sun, Z. Ren, Z. Wang, H. Wang, D. Wu, X.W. Sun, W.C.H. Choy, K. Wang, *Adv. Opt. Mater.*, 2023, **11**, 2202721.
- S45. M. Alahbakhshi, A. Mishra, G. Verkhogliadov, E.E. Turner, R. Haroldson, A.C. Adams, Q. Gu, J.J. Rack, J.D. Slinker, A.A. Zakhidov, *Adv. Funct. Mater.*, 2023, **33**, 2214315.
- S46. C. Zhu, C. Zhao, F. Yuan, Y. Li, J. Li, X. Liu, L. Li, H. Dong, L. Yan, S. Wang, B. Jiao, Z. Wu, *Adv. Opt. Mater.*, 2023, **11**, 2202901.
- S47. F. Ye, H. Yan, S. Liu, B. Liu, Z. Zhang, M. Tian, T. Zheng, X. Lan, J. Huang, C. Meng, P. Xu, G. Li, *ACS Appl. Mater. Interfaces*, 2022, **14**, 50393-50400.
- S48. A. Liu, C. Bi, J. Tian, *Adv. Funct. Mater.*, 2022, **32**, 2207069.
- S49. Y. Shen, Y.-Q. Li, K. Zhang, L.-J. Zhang, F.-M. Xie, L. Chen, X.-Y. Cai, Y. Lu, H. Ren, X. Gao, H. Xie, H. Mao, S. Kera, J.-X. Tang, *Adv. Funct. Mater.*, 2022, **32**, 2206574.
- S50. C. Bi, Z. Yao, X. Sun, X. Wei, J. Wang, J. Tian, *Adv. Mater.*, 2021, **33**, 2006722.
- S51. Y. Shen, J.-K. Wang, Y.-Q. Li, K.-C. Shen, Z.-H. Su, L. Chen, M.-L. Guo, X.-Y. Cai, F.-M. Xie, X.-Y. Qian, X. Gao, I.S. Zhidkov, J.-X. Tang, *Adv. Sci.*, 2021, **8**, 2102213.
- S52. Y. Shen, H.-Y. Wu, Y.-Q. Li, K.-C. Shen, X. Gao, F. Song, J.-X. Tang, *Adv. Funct. Mater.*, 2021, **31**, 2103870.
- S53. Y. Liu, L.K. Ono, G. Tong, H. Zhang, Y. Qi, *ACS Energy Lett.*, 2021, **6**, 908-914.
- S54. W. Shen, Y. Yu, W. Zhang, Y. Chen, J. Zhang, L. Yang, J. Feng, G. Cheng, L. Liu, S. Chen, *ACS Appl. Mater. Interfaces*, 2022, **14**, 5682-5691.
- S55. Y. Liu, Z. Li, J. Xu, Y. Dong, B. Chen, S.M. Park, D. Ma, S. Lee, J.E. Huang, S. Teale, O. Voznyy, E.H. Sargent, *JACS*, 2022, **144**, 4009-4016.
- S56. H. Liu, T.B. Shonde, O.J. Olasupo, M.S. Islam, T.F. Manny, M. Woodhouse, X. Lin, J.S.R. Vellore Winfred, K.S. Mao, E. Lochner, I. Fatima, K. Hanson, B. Ma, *ACS Energy Lett.*, 2023, **8**, 4259-4266.
- S57. Z. Yu, X. Shen, X. Fan, Y.-K. Jung, W.H. Jeong, A. Dasgupta, M. Kober-Czerny, P. Caprioglio, S.H. Park, H. Choi, H.J. Snaith, S.D. Stranks, B.R. Lee, *ACS Energy Lett.*, 2023, **8**, 4296-4303.
- S58. Y.S. Shin, C.B. Park, A. Adhikari, Y.J. Yoon, H.W. Cho, J.G. Son, J. Seo, T. Song, W. Lee, J. Yeop, J.W. Kim, M. Gong, B. Walker, O.-H. Kwon, G.-H. Kim, J.Y. Kim, *ACS Energy Lett.*, 2022, **7**, 3345-3352.
- S59. Z. Ren, L. Li, J. Yu, R. Ma, X. Xiao, R. Chen, K. Wang, X.W. Sun, W.-J. Yin, W.C.H. Choy, *ACS Energy Lett.*, 2020, **5**, 2569-2579.
- S60. F. Yuan, C. Ran, L. Zhang, H. Dong, B. Jiao, X. Hou, J. Li, Z. Wu, *ACS Energy Lett.*, 2020, **5**, 1062-1069.
- S61. M. Jiang, X. Zhang, F. Wang, *Adv. Mater.*, 2024, 2400565.
- S62. D. Zhang, Y. Fu, H. Zhan, C. Zhao, X. Gao, C. Qin, L. Wang, *Light Sci. Appl.*, 2022, **11**, 69.
- S63. J. Li, P. Du, Q. Guo, L. Sun, Z. Shen, J. Zhu, C. Dong, L. Wang, X. Zhang, L. Li, C. Yang, J. Pan, Z. Liu, B. Xia, Z. Xiao, J. Du, B. Song, J. Luo, J. Tang, *Nat. Photonics*, 2023, **17**, 435-441.
- S64. Y.-H. Kim, J. Park, S. Kim, J.S. Kim, H. Xu, S.-H. Jeong, B. Hu, T.-W. Lee, *Nat. Nanotechnol.*, 2022, **17**, 590-597.
- S65. W. Chen, Z. Huang, H. Yao, Y. Liu, Y. Zhang, Z. Li, H. Zhou, P. Xiao, T. Chen, H. Sun, J. Huang, Z. Xiao, *Nat. Photonics*, 2023, **17**, 401-407.
- S66. J. Tang, G. Zhang, C. Wang, L. Deng, X. Zhu, H. Yu, K. Wang, J. Li, *J. Phys. Chem. Lett.*, 2024, **15**, 1112-1120.
- S67. K. Lin, J. Xing, L.N. Quan, F.P.G. de Arquer, X. Gong, J. Lu, L. Xie, W. Zhao, D. Zhang, C. Yan, W. Li, X. Liu, Y. Lu, J. Kirman, E.H. Sargent, Q. Xiong, Z. Wei, *Nature*, 2018, **562**, 245-248.
- S68. J. Lou, S. Zhang, Y. Tan, T. Zhou, Y. Zhuge, J. Peng, *ACS Appl. Nano Mater.*, 2024, **7**, 6284-6292.
- S69. S.-Q. Sun, J.-W. Tai, W. He, Y.-J. Yu, Z.-Q. Feng, Q. Sun, K.-N. Tong, K. Shi, B.-C. Liu, M. Zhu, G. Wei, J. Fan, Y.-M. Xie, L.-S. Liao, M.-K. Fung, *Adv. Mater.*, 2024, 2400421.
- S70. T. Fang, T. Wang, X. Li, Y. Dong, S. Bai, J. Song, *Sci. Bull.*, 2021, **66**, 36-43.
- S71. A.R.B.M. Yusoff, A.E.X. Gavim, A.G. Macedo, W.J. da Silva, F.K. Schneider, M.A.M. Teridi, *Mater. Today Chem.*, 2018, **10**, 104-111.
- S72. F. Yang, Q. Zeng, W. Dong, C. Kang, Y. Zhao, H. Wei, W. Zheng, X. Zhang, B. Yang, *Light Sci. Appl.*, 2023, **12**, 119.
- S73. H. Kim, J.S. Kim, J.-M. Heo, M. Pei, I.-H. Park, Z. Liu, H.J. Yun, M.-H. Park, S.-H. Jeong, Y.-H. Kim, J.-W. Park, E. Oveisi, S. Nagane, A. Sadhanala, L. Zhang, J.J. Kweon, S.K. Lee, H. Yang, H.M. Jang, R.H. Friend, K.P. Loh, M.K. Nazeeruddin, N.-G. Park, T.-W. Lee, *Nat. Commun.*, 2020, **11**, 3378.
- S74. L. Xu, J. Li, B. Cai, J. Song, F. Zhang, T. Fang, H. Zeng, *Nat. Commun.*, 2020, **11**, 3902.
- S75. J.S. Kim, J.-M. Heo, G.-S. Park, S.-J. Woo, C. Cho, H.J. Yun, D.-H. Kim, J. Park, S.-C. Lee, S.-H. Park, E. Yoon, N.C. Greenham, T.-W. Lee, *Nature*, 2022, **611**, 688-694.
- S76. H. Wang, X. Zhang, Q. Wu, F. Cao, D. Yang, Y. Shang, Z. Ning, W. Zhang, W. Zheng, Y. Yan, S.V. Kershaw, L. Zhang, A.L. Rogach, X. Yang, *Nat. Commun.*, 2019, **10**, 665.
- S77. S. Ding, Q. Wang, W. Gu, Z. Tang, B. Zhang, C. Wu, X. Zhang, H. Chen, X. Zhang, R. Cao, T. Chen, L. Qian, C. Xiang, *Nat. Photonics*, 2024, **18**, 363-370.
- S78. L. Na Quan, D. Ma, Y. Zhao, O. Voznyy, H. Yuan, E. Bladt, J. Pan, F.P. Garcia de Arquer, R. Sabatini, Z. Piontkowski, A.-H. Emwas, P. Todorović, R. Quintero-Bermudez, G. Walters, J.Z. Fan, M. Liu, H. Tan, M.I. Saidaminov, L. Gao, Y. Li, D.H. Anjum, N. Wei, J. Tang, D.W. McCamant, M.B.J. Roeffaers, S. Bals, J. Hofkens, O.M. Bakr, Z.-H. Lu, E.H. Sargent, *Nat. Commun.*, 2020, **11**, 170.
- S79. C. Sun, Y. Jiang, M. Cui, L. Qiao, J. Wei, Y. Huang, L. Zhang, T. He, S. Li, H.-Y. Hsu, C. Qin, R. Long, M. Yuan, *Nat. Commun.*, 2021, **12**, 2207.
- S80. L. Kong, X. Zhang, Y. Li, H. Wang, Y. Jiang, S. Wang, M. You, C. Zhang, T. Zhang, S.V. Kershaw, W. Zheng, Y. Yang, Q. Lin, M. Yuan, A.L. Rogach, X. Yang, *Nat. Commun.*, 2021, **12**, 1246.
- S81. C. Qin, T. Matsushima, W.J. Potscavage, A.S.D. Sandanayaka, M.R. Leyden, F. Bencheikh, K. Goushi, F. Mathevet, B. Heinrich, G. Yumoto, Y. Kanemitsu, C. Adachi, *Nat. Photonics*, 2020, **14**, 70-75.
- S82. Y. Jiang, M. Cui, S. Li, C. Sun, Y. Huang, J. Wei, L. Zhang, M. Lv, C. Qin, Y. Liu, M. Yuan, *Nat. Commun.*, 2021, **12**, 336.

- S83. X. Bao, Y. Gao, Y. Liu, Z. Xu, F. Zhang, M. Lu, Z. Wu, Y. Wu, Q. Wang, Y. Zhang, Y. Wang, Z. Shi, J. Hu, X. Bai, *ACS Energy Lett.*, 2023, **8**, 1018-1025.
- S84. J. Chen, L. Cai, C. Jiang, Z. Chen, G. Bai, X. Li, Y. Li, Y. Zou, T. Song, B. Sun, *J. Phys. Chem. C*, 2023, **127**, 9388-9396.
- S85. A. Liu, P. Lu, M. Lu, X. Chai, Y. Liu, G. Guan, Y. Gao, Z. Wu, X. Bai, J. Hu, D. Wang, Y. Zhang, *Nano Lett.*, 2023, **23**, 11082-11090.
- S86. Y.J. Kim, B.W. Kim, S.H. Im, *Adv. Mater. Interfaces*, 2024, **11**, 2400020.
- S87. Q. Cui, D. Zhang, Y. Gao, C. Fan, Q. Cai, H. Li, X. Wu, M. Zhu, J. Si, X. Dai, H. He, Z. Ye, *ACS Nano*, 2024, **18**, 10609-10617.
- S88. Laxmi, M. Misra, N. Gaur, S. Gupta, D. Kabra, *Adv. Opt. Mater.*, 2024, **12**, 2302961.
- S89. J. Ma, L. Yang, Y. Xue, Y. Gao, H. Chen, D. Zhang, Z. Wang, Y. Kuang, Y. Yu, M. Shao, *ACS Energy Lett.*, 2023, **8**, 4617-4624.
- S90. W. Yang, X. He, X. Huang, X. Wang, Y. Zhang, C.-H. Gao, *ACS Appl. Mater. Interfaces*, 2024, **16**, 1628-1637.
- S91. H. Zhang, Y. Tang, C. Chen, M. Xiao, J. Yang, W. Zhang, C. Qin, T. Xiang, L. Xu, P. Chen, *Adv. Opt. Mater.*, 2024, **12**, 2303051.
- S92. Z. Xu, T. Feng, Y. Gao, F. Zhang, Y. Wu, L. Xu, D. Zhou, D. Liu, B. Dong, X. Bai, Z. Shi, J. Hu, T. Li, F. Yan, H. Song, Y. Zhang, *Laser Photonics Rev.*, 2024, **18**, 2300890.
- S93. J. Lu, W. Feng, G. Mei, J. Sun, C. Yan, D. Zhang, K. Lin, D. Wu, K. Wang, Z. Wei, *Adv. Sci.* 2020, **7**, 2000689.
- S94. K. Lin, C. Yan, R.P. Sabatini, W. Feng, J. Lu, K. Liu, D. Ma, Y. Shen, Y. Zhao, M. Li, C. Tian, L. Xie, E.H. Sargent, Z. Wei, *Adv. Funct. Mater.*, 2022, **32**, 2200350.
- S95. X. Zhang, Q. Wang, Z. Yao, M. Deng, J. Wang, L. Qian, Y. Ren, Y. Yan, C. Xiang, *Adv. Sci.*, 2023, **10**, 2304696.
- S96. J.-N. Yang, Z.-Y. Ma, J.-D. Luo, J.-J. Wang, C. Ye, Y. Zhou, Y.-C. Yin, X.-C. Ru, T. Chen, L.-Y. Li, L.-Z. Feng, K.-H. Song, J. Ge, Q. Zhang, H.-B. Yao, *Nano Lett.*, 2023, **23**, 3385-3393.
- S97. X. Qin, Y. He, C.K. Tao, A. Sergeev, K.S. Wong, Z. Ren, Q. Liang, T.L. Leung, G. Li, J. Popović, A.M.C. Ng, A.B. Djurišić, *ACS Appl. Mater. Interfaces*, 2023, **15**, 30083-30092.
- S98. W. Dong, X. Zhang, F. Yang, Q. Zeng, W. Yin, W. Zhang, H. Wang, X. Yang, S.V. Kershaw, B. Yang, A.L. Rogach, W. Zheng, *ACS Nano*, 2022, **16**, 9679-9690.
- S99. Y.-C. Ye, Y. Shen, W. Zhou, S.-C. Feng, J.-Y. Wang, Y.-Q. Li, J.-X. Tang, *Adv. Funct. Mater.*, 2023, **33**, 2307818.
- S100. W. Bai, T. Xuan, H. Zhao, H. Dong, X. Cheng, L. Wang, R.-J. Xie, *Adv. Mater.*, 2023, **35**, 2302283.
- S101. T. Fang, S. Yuan, X. Li, Q. Shan, Y. Zhou, B. Xu, G. Liu, S. Zhang, X. Li, W. Li, Z. Fan, H. Zeng, *Adv. Opt. Mater.*, 2024, **12**, 2302253.
- S102. M. Li, Y. Zhao, X. Qin, Q. Ma, J. Lu, K. Lin, P. Xu, Y. Li, W. Feng, W.-H. Zhang, Z. Wei, *Nano Lett.*, 2022, **22**, 2490-2496.
- S103. H. Zhao, H. Chen, S. Bai, C. Kuang, X. Luo, P. Teng, C. Yin, P. Zeng, L. Hou, Y. Yang, L. Duan, F. Gao, M. Liu, *ACS Energy Lett.*, 2021, **6**, 2395-2403.
- S104. P. Sadhukhan, M.S. Kim, S.-D. Baek, J.-M. Myoung, *Small Methods*, 2023, **7**, 2201407.
- S105. S.-Q. Sun, Q. Sun, Y.-J. Ji, Y.-L. Xu, W. He, M. Zhu, J.-G. Zhou, Y.-J. Yu, D.-D. Feng, Y.-M. Xie, Y.-Y. Li, M.-K. Fung, *Small*, 2023, **19**, 2205336.
- S106. W. Yu, M. Wei, Z. Tang, H. Zou, L. Li, Y. Zou, S. Yang, Y. Wang, Y. Zhang, X. Li, H. Guo, C. Wu, B. Qu, Y. Gao, G. Lu, S. Wang, Z. Chen, Z. Liu, H. Zhou, B. Wei, Y. Liao, L. Zhang, Y. Li, Q. Gong, E.H. Sargent, L. Xiao, *Adv. Mater.*, 2023, **35**, 2301114.
- S107. Z. Guo, Y. Liang, D. Ni, L. Li, S. Liu, Y. Zhang, Q. Chen, Q. Zhang, Q. Wang, H. Zhou, *Adv. Mater.*, 2023, **35**, 2302711.
- S108. L. Zhou, M. Yan, G. Luo, L. Xu, Y. Fang, D. Yang, *Adv. Funct. Mater.*, 2023, **33**, 2303370.
- S109. F. Cao, Q. Wu, W. Li, S. Wang, L. Kong, J. Zhang, X. Zhang, H. Li, W. Hua, A.L. Rogach, X. Yang, *Small*, 2023, **19**, 2207260.
- S110. X. Li, R. Guo, C. Peng, Z. He, X. Zhu, B. Chen, L. Sun, J. Chen, L. Wang, *Adv. Opt. Mater.*, 2024, **12**, 2301498.
- S111. K. Yang, J. Mao, J. Zheng, Y. Yu, B. Xu, Q. Zhang, X. Weng, Q. Lin, T. Guo, F. Li, *Adv. Electron. Mater.*, 2023, **9**, 2201199.
- S112. D. Ma, K. Lin, Y. Dong, H. Choubisa, A.H. Proppe, D. Wu, Y.-K. Wang, B. Chen, P. Li, J.Z. Fan, F. Yuan, A. Johnston, Y. Liu, Y. Kang, Z.-H. Lu, Z. Wei, E.H. Sargent, *Nature*, 2021, **599**, 594-598.
- S113. Y.-H. Kim, S. Kim, A. Kakekhani, J. Park, J. Park, Y.-H. Lee, H. Xu, S. Nagane, R.B. Wexler, D.-H. Kim, S.H. Jo, L. Martínez-Sarti, P. Tan, A. Sadhanala, G.-S. Park, Y.-W. Kim, B. Hu, H.J. Bolink, S. Yoo, R.H. Friend, A.M. Rappe, T.-W. Lee, *Nat. Photonics*, 2021, **15**, 148-155.
- S114. Z. Liu, W. Qiu, X. Peng, G. Sun, X. Liu, D. Liu, Z. Li, F. He, C. Shen, Q. Gu, F. Ma, H.-L. Yip, L. Hou, Z. Qi, S.-J. Su, *Adv. Mater.*, 2021, **33**, 2103268.
- S115. L. Cai, J. Chen, J. Zang, J. Zhou, Y. Zou, G. Bai, Z. Chen, T. Song, C.-K. Wang, B. Sun, *Laser Photonics Rev.*, 2023, **17**, 2200847.
- S116. Y. Li, F. Li, Z. Yu, V. Tamilavan, C.-M. Oh, W.H. Jeong, X. Shen, S. Lee, X. Du, E. Yang, Y. Ahn, I.-W. Hwang, B.R. Lee, S.H. Park, *Small*, 2024, **20**, 2308847.
- S117. J.H. Park, A.K. Harit, C.H. Jang, J.E. Jeong, H.Y. Woo, M.H. Song, *Mater. Today Energy*, 2021, **21**, 100755.
- S118. C. Wei, W. Su, J. Li, B. Xu, Q. Shan, Y. Wu, F. Zhang, M. Luo, H. Xiang, Z. Cui, H. Zeng, *Adv. Mater.*, 2022, **34**, 2107798.
- S119. H. Tsai, S. Shrestha, R.A. Vilá, W. Huang, C. Liu, C.-H. Hou, H.-H. Huang, X. Wen, M. Li, G. Wiederrecht, Y. Cui, M. Cotlet, X. Zhang, X. Ma, W. Nie, *Nat. Photonics*, 2021, **15**, 843-849.
- S120. M. Liu, Q. Wan, H. Wang, F. Carulli, X. Sun, W. Zheng, L. Kong, Q. Zhang, C. Zhang, Q. Zhang, S. Brovelli, L. Li, *Nat. Photonics*, 2021, **15**, 379-385.
- S121. M. Jiang, X. Zhang, F. Wang, *Adv. Mater.*, 2024, 2400565.
- S122. S. Xing, Y. Yuan, G. Zhang, S. Zhang, Y. Lian, W. Tang, K. Zhou, S. Liu, Y. Gao, Z. Ren, G. Zhang, T. Sun, B. Zhao, D. Di, *ACS Energy Lett.*, 2024, **9**, 3643-3651.
- S123. Y. Chung, K. Su Kim, J. Woong Jung, *Chem. Eng. J.*, 2023, **451**, 138892.
- S124. S. Liu, H. Zhan, C. Qin, C. Qin, *Chem. Eng. J.*, 2024, **479**, 147866.
- S125. J.-K. Chang, P. Sadhukhan, J.-M. Myoung, *Nano Energy*, 2024, **120**, 109228.
- S126. Y.-C. Ye, Y.-Q. Li, X.-Y. Cai, W. Zhou, Y. Shen, K.-C. Shen, J.-K. Wang, X. Gao, I.S. Zhidkov, J.-X. Tang, *Adv. Funct. Mater.*, 2021, **31**, 2105813.

- S127. X. Fu, W. Li, X. Zeng, C. Yan, X. Peng, Y. Gao, Q. Wang, J. Cao, S. Yang, W. Yang, *J. Phys. Chem. Lett.*, 2022, **13**, 2217-2225.
- S128. Y. Ke, N. Wang, D. Kong, Y. Cao, Y. He, L. Zhu, Y. Wang, C. Xue, Q. Peng, F. Gao, W. Huang, J. Wang, *J. Phys. Chem. Lett.*, 2019, **10**, 380-385.
- S129. Y.-F. Lan, J.-S. Yao, J.-N. Yang, Y.-H. Song, X.-C. Ru, Q. Zhang, L.-Z. Feng, T. Chen, K.-H. Song, H.-B. Yao, *Nano Lett.*, 2021, **21**, 8756-8763.
- S130. X. Fu, M. Wang, Y. Jiang, X. Guo, X. Zhao, C. Sun, L. Zhang, K. Wei, H.-Y. Hsu, M. Yuan, *Nano Lett.*, 2023, **23**, 6465-6473.
- S131. L. Yang, Y. Zhang, J. Ma, P. Chen, Y. Yu, M. Shao, *ACS Energy Lett.*, 2021, **6**, 2386-2394.
- S132. H. Rui, X. Wu, Y. Qiu, X. Liu, S. Bu, H. Cao, S. Yin, *Adv. Funct. Mater.*, **33**, 2308147.
- S133. B. Chen, H. Liu, J. Yang, M. Ahmadi, Q. Chen, N. Yin, S. Zhang, M. Xiao, H. Zhang, L. Xu, P. Chen, *Adv. Funct. Mater.*, 2024, 2402522.
- S134. J. Li, Z. Ren, W. Xia, C. Luo, Z. Zheng, W. Ma, H. Ji, Y. Chen, *Adv. Opt. Mater.*, 2023, **11**, 2300194.
- S135. P. Shen, Z. Tang, J. Fan, T. Zhang, L. Qian, D. Zhao, C. Xiang, *Adv. Opt. Mater.*, 2024, 2303237.
- S136. J.-M. Hao, Y.-H. Song, X.-C. Ru, Z.-D. Li, Y.-C. Yin, B.-S. Zhu, Z. Zhao, G.-J. Ding, Y.-L. Hu, Z.-Y. Ma, H.-B. Yao, *Adv. Opt. Mater.*, 2024, 2400269.
- S137. X.-Y. Cai, Y. Yu, Y.-C. Ye, Y. Shen, M.-L. Guo, J.-K. Wang, K.-C. Shen, Y.-Q. Li, J.-X. Tang, *J. Mater. Chem. C*, 2021, **9**, 16682-16692.
- S138. Z. Liu, X. Peng, S. Xing, W. Qiu, M. Li, C. Shen, G. Sun, Z. Zhou, Q. Gu, J. Pu, J. Yang, J. Zhang, D. Liu, C. Shen, J. Qing, Q. Xue, H.-L. Yip, D. Di, L. Hou, Z. Qi, S.-J. Su, *Adv. Opt. Mater.*, 2022, **10**, 2201123.
- S139. N. Li, S. Apergi, C.C.S. Chan, Y. Jia, F. Xie, Q. Liang, G. Li, K.S. Wong, G. Brocks, S. Tao, N. Zhao, *Adv. Mater.*, 2022, **34**, 2202042.
- S140. H. Li, H. Lin, D. Ouyang, C. Yao, C. Li, J. Sun, Y. Song, Y. Wang, Y. Yan, Y. Wang, Q. Dong, W.C.H. Choy, *Adv. Mater.*, 2021, **33**, 2008820.
- S141. J. Hu, C. Bi, K. Ren, X. Zhang, W. Wang, S. Ma, M. Wei, Y. Lu, M. Sui, *Nano Lett.*, 2024, **24**, 4571-4579.
- S142. W.J. Mir, A. Alamoudi, J. Yin, K.E. Yorov, P. Maity, R. Naphade, B. Shao, J. Wang, M.N. Lintangpradipto, S. Nematulloev, A.-H. Emwas, A. Genovese, O.F. Mohammed, O.M. Bakr, *JACS*, 2022, **144**, 13302-13310.
- S143. J.-N. Yang, Y. Song, J.-S. Yao, K.-H. Wang, J.-J. Wang, B.-S. Zhu, M.-M. Yao, S.U. Rahman, Y.-F. Lan, F.-J. Fan, H.-B. Yao, *JACS*, 2020, **142**, 2956-2967.
- S144. Y. Kuang, L. Yang, J. Ma, T. Bie, D. Zhang, Y. Xue, N. Zhou, M. Shao, *ACS Mater. Lett.*, 2023, **5**, 2922-2928.
- S145. B. Lyu, H. Lin, D. Li, A. Sergeev, Q. Wang, Z. Jiang, L. Huo, H. Su, K.S. Wong, Y. Wang, W.C.H. Choy, *ACS Energy Lett.*, 2024, **9**, 2118-2127.
- S146. Y. Zhou, T. Fang, G. Liu, H. Xiang, L. Yang, Y. Li, R. Wang, D. Yan, Y. Dong, B. Cai, H. Zeng, *Adv. Funct. Mater.*, 2021, **31**, 2106871.
- S147. X.-C. Ru, J.-N. Yang, J. Ge, L.-Z. Feng, J.-J. Wang, K.-H. Song, T. Chen, Z. Yu Ma, L.-Y. Li, H.-B. Yao, *Adv. Opt. Mater.*, 2023, **11**, 2300606.
- S148. J. Zeng, X. Sun, Y. Liu, W. Jin, S. He, X. Zhu, K. Niu, G. Sun, J. Li, H. He, T. Sun, Z. Ye, Y. Jin, *Nat. Photonics*, 2024, **18**, 325-333.
- S149. Y. Hassan, J.H. Park, M.L. Crawford, A. Sadhanala, J. Lee, J.C. Sadighian, E. Mosconi, R. Shivanna, E. Radicchi, M. Jeong, C. Yang, H. Choi, S.H. Park, M.H. Song, F. De Angelis, C.Y. Wong, R.H. Friend, B.R. Lee, H.J. Snaith, *Nature*, 2021, **591**, 72-77.
- S150. D. Han, J. Wang, L. Agosta, Z. Zang, B. Zhao, L. Kong, H. Lu, I. Mosquera-Lois, V. Carnevali, J. Dong, J. Zhou, H. Ji, L. Pfeifer, S.M. Zakeeruddin, Y. Yang, B. Wu, U. Rothlisberger, X. Yang, M. Grätzel, N. Wang, *Nature*, 2023, **622**, 493-498.
- S151. F. Yuan, X. Zheng, A. Johnston, Y.-K. Wang, C. Zhou, Y. Dong, B. Chen, H. Chen, J.Z. Fan, G. Sharma, P. Li, Y. Gao, O. Voznyy, H.-T. Kung, Z.-H. Lu, O.M. Bakr, E.H. Sargent, *Sci. Adv.*, 2020, **6**, eabb0253.
- S152. Y.-H. Song, J. Ge, L.-B. Mao, K.-H. Wang, X.-L. Tai, Q. Zhang, L. Tang, J.-M. Hao, J.-S. Yao, J.-J. Wang, T. Ma, J.-N. Yang, Y.-F. Lan, X.-C. Ru, L.-Z. Feng, G. Zhang, Y. Lin, Q. Zhang, H.-B. Yao, *Sci. Adv.*, 2022, **8**, eabq2321.
- S153. C.-H. Chen, M.-H. Yu, Y.-Y. Wang, Y.-C. Tseng, I.H. Chao, I.C. Ni, B.-H. Lin, Y.-J. Lu, C.-C. Chueh, *Small*, 2024, 2307774.
- S154. A.R.B.M. Yusoff, A.E.X. Gavim, A.G. Macedo, W.J. da Silva, F.K. Schneider, M.A.M. Teridi, *Mater. Today Chem.*, 2018, **10**, 104-111.
- S155. X. Zhou, M. Yang, C. Shen, L. Lian, L. Hou, J. Zhang, *Nano Lett.*, 2024, **24**, 3719-3726.
- S156. Y.-K. Wang, H. Wan, S. Teale, L. Grater, F. Zhao, Z. Zhang, H.-W. Duan, M. Imran, S.-D. Wang, S. Hoogland, L.-S. Liao, *Nature*, 2024, **629**, 586-591.
- S157. C. Kuang, Z. Hu, Z. Yuan, K. Wen, J. Qing, L. Kobera, S. Abbrent, J. Brus, C. Yin, H. Wang, W. Xu, J. Wang, S. Bai, F. Gao, *Joule*, 2021, **5**, 618-630.
- S158. Z. Yuan, Z. Hu, I. Persson, C. Wang, X. Liu, C. Kuang, W. Xu, S. Bai, F. Gao, *Joule*, 2022, **6**, 2423-2436.
- S159. H. Wang, Z. Chen, J. Hu, H. Yu, C. Kuang, J. Qin, X. Liu, Y. Lu, M. Fahlman, L. Hou, X.-K. Liu, F. Gao, *Adv. Funct. Mater.*, 2021, **31**, 2007596.
- S160. R. Khan, S. Chu, Z. Li, K.O. Ighodalo, W. Chen, Z. Xiao, *Adv. Funct. Mater.*, 2022, **32**, 2203650.
- S161. N. Li, L. Song, Y. Jia, Y. Dong, F. Xie, L. Wang, S. Tao, N. Zhao, *Adv. Mater.*, 2020, **32**, 1907786.
- S162. L. Zhao, K. Roh, S. Kacmoli, K. Al Kurdi, S. Jhulki, S. Barlow, S.R. Marder, C. Gmachl, B.P. Rand, *Adv. Mater.*, 2020, **32**, 2000752.
- S163. Z. Li, Z. Ren, Q. Liang, P.W.K. Fong, J. Tian, G. Li, *Adv. Mater.*, 2024, 2313981.
- S164. X. Sun, W. Meng, K.H. Ngai, Z. Nie, C. Luan, W. Zhang, S. Li, X. Lu, B. Wu, G. Zhou, M. Long, J. Xu, *Adv. Mater.*, 2024, 2400347.
- S165. K. Elkhouly, I. Goldberg, H.-G. Boyen, A. Franquet, V. Spampinato, T.-H. Ke, R. Gehlhaar, J. Genoe, J. Hofkens, P. Heremans, W. Qiu, *Adv. Opt. Mater.*, 2021, **9**, 2100586.
- S166. X. Sun, T. Liang, K.H. Ngai, Z. Nie, K. Fan, S. Li, C.C.S. Chan, K.S. Wong, X. Lu, J. Xu, M. Long, *Adv. Opt. Mater.*, 2023, **11**, 2300464.
- S167. K.H. Ngai, X. Sun, X. Zou, K. Fan, Q. Wei, M. Li, S. Li, X. Lu, W. Meng, B. Wu, G. Zhou, M. Long, J. Xu, *Adv. Sci.*, 2024, **11**, 2309500.
- S168. Z. Andaji-Garmaroudi, M. Abdi-Jalebi, F.U. Kosasih, T. Doherty, S. Macpherson, A.R. Bowman, G.J. Man, U.B. Cappel, H. Rensmo, C. Ducati, R.H. Friend, S.D. Stranks, *Adv. Energy Mater.*, 2020, **10**, 2002676.

- S169. H. Wang, Z. Chen, F. Tian, G. Zheng, H. Wang, T. Zhang, J. Qin, X. Gao, P.A. van Aken, L. Zhang, X.-K. Liu, F. Gao, *Adv. Energy Mater.*, 2023, **13**, 2202185.
- S170. A. Liang, K. Wang, Y. Gao, B.P. Finkenauer, C. Zhu, L. Jin, L. Huang, L. Dou, *Angew. Chem. Int. Ed.*, 2021, **60**, 8337-8343.
- S171. X. Xu, K. Xiao, G. Hou, Y. Zhang, T. Zhu, L. Xu, J. Xu, K. Chen, *Adv. Opt. Mater.*, 9, 2021, 2100636.
- S172. Y. Guo, S. Aperi, N. Li, M. Chen, C. Yin, Z. Yuan, F. Gao, F. Xie, G. Brocks, S. Tao, N. Zhao, *Nat. Commun.*, 2021, **12**, 644.
- S173. Q. Wang, S. Ding, S. He, T. Zhang, L. Qian, P. Xiao, T. Chen, C. Xiang, *Adv. Opt. Mater.*, 2023, **11**, 2201778.
- S174. Y. Ji, Q. Zhong, M. Yu, H. Yan, L. Li, Q. Li, H. Xu, S. Li, P. Chen, L. Zhao, X. Jia, Y. Xiao, Y. Zhang, F. Xu, L. Zhao, D. Luo, X. Yang, Q. Gong, X. Wang, R. Zhu, *ACS Nano*, 2024, **18**, 8157-8167.
- S175. W. Chen, Y. Shi, J. Chen, P. Ma, Z. Fang, D. Ye, Y. Lu, Y. Yuan, J. Zhao, Z. Xiao, *Adv. Mater.*, 2021, **33**, 2104842.
- S176. Y. Miao, Y. Ke, N. Wang, W. Zou, M. Xu, Y. Cao, Y. Sun, R. Yang, Y. Wang, Y. Tong, W. Xu, L. Zhang, R. Li, J. Li, H. He, Y. Jin, F. Gao, W. Huang, J. Wang, *Nat. Commun.*, 2019, **10**, 3624.
- S177. H. Wang, F.U. Kosasih, H. Yu, G. Zheng, J. Zhang, G. Pozina, Y. Liu, C. Bao, Z. Hu, X. Liu, L. Kobera, S. Abbrent, J. Brus, Y. Jin, M. Fahlman, R.H. Friend, C. Ducati, X.-K. Liu, F. Gao, *Nat. Commun.*, 2020, **11**, 891.
- S178. Y. Liu, C. Tao, Y. Cao, L. Chen, S. Wang, P. Li, C. Wang, C. Liu, F. Ye, S. Hu, M. Xiao, Z. Gao, P. Gui, F. Yao, K. Dong, J. Li, X. Hu, H. Cong, S. Jia, T. Wang, J. Wang, G. Li, W. Huang, W. Ke, J. Wang, G. Fang, *Nat. Commun.*, 2022, **13**, 7425.
- S179. B. Guo, R. Lai, S. Jiang, L. Zhou, Z. Ren, Y. Lian, P. Li, X. Cao, S. Xing, Y. Wang, W. Li, C. Zou, M. Chen, Z. Hong, C. Li, B. Zhao, D. Di, *Nat. Photonics*, 2022, **16**, 637-643.
- S180. F. Yuan, G. Folpini, T. Liu, U. Singh, A. Treglia, J.W.M. Lim, J. Klarbring, S.I. Simak, I.A. Abrikosov, T.C. Sum, A. Petrozza, F. Gao, *Nat. Photonics*, 2024, **18**, 170-176.
- S181. N.K. Kumawat, W. Tress, F. Gao, *Nat. Commun.*, 2021, **12**, 4899.
- S182. Y. Zou, P. Teng, W. Xu, G. Zheng, W. Lin, J. Yin, L. Kobera, S. Abbrent, X. Li, J.A. Steele, E. Solano, M.B.J. Roeffaers, J. Li, L. Cai, C. Kuang, I.G. Scheblykin, J. Brus, K. Zheng, Y. Yang, O.F. Mohammed, O.M. Bakr, T. Pullerits, S. Bai, B. Sun, F. Gao, *Nat. Commun.*, 2021, **12**, 4831.
- S183. L. Zhu, H. Cao, C. Xue, H. Zhang, M. Qin, J. Wang, K. Wen, Z. Fu, T. Jiang, L. Xu, Y. Zhang, Y. Cao, C. Tu, J. Zhang, D. Liu, G. Zhang, D. Kong, N. Fan, G. Li, C. Yi, Q. Peng, J. Chang, X. Lu, N. Wang, W. Huang, J. Wang, *Nat. Commun.*, 2021, **12**, 5081.
- S184. H. Min, N. Wang, N. Chen, Y. Tong, Y. Wang, J. Wang, J. Liu, S. Wang, X. Wu, P. Yang, H. Shi, C. Zhuo, Q. Chen, J. Li, D. Zhang, X. Lu, C. Zhu, Q. Peng, L. Zhu, J. Chang, W. Huang, J. Wang, *Nat. Nanotechnol.*, 2024, **19**, 632-637.
- S185. B. Zhao, S. Bai, V. Kim, R. Lamboll, R. Shivanna, F. Auras, J.M. Richter, L. Yang, L. Dai, M. Alsari, X.-J. She, L. Liang, J. Zhang, S. Lilliu, P. Gao, H.J. Snaith, J. Wang, N.C. Greenham, R.H. Friend, D. Di, *Nat. Photonics*, 2018, **12**, 783-789.
- S186. W. Xu, Q. Hu, S. Bai, C. Bao, Y. Miao, Z. Yuan, T. Borzda, A.J. Barker, E. Tyukalova, Z. Hu, M. Kaweckki, H. Wang, Z. Yan, X. Liu, X. Shi, K. Uvdal, M. Fahlman, W. Zhang, M. Duchamp, J.-M. Liu, A. Petrozza, J. Wang, L.-M. Liu, W. Huang, F. Gao, *Nat. Photonics*, 2019, **13**, 418-424.
- S187. H. Min, J. Chang, Y. Tong, J. Wang, F. Zhang, Z. Feng, X. Bi, N. Chen, Z. Kuang, S. Wang, L. Yuan, H. Shi, N. Zhao, D. Qian, S. Xu, L. Zhu, N. Wang, W. Huang, J. Wang, *Nat. Photonics*, 2023, **17**, 755-760.
- S188. Y. Shang, Y. Liao, Q. Wei, Z. Wang, B. Xiang, Y. Ke, W. Liu, Z. Ning, *Sci. Adv.*, 2019, **5**, eaaw8072.
- S189. J. Guo, Z. Shi, J. Xia, K. Wang, Q. Wei, C. Liang, D. Zhao, Z. Zhang, S. Chen, T. Liu, S. Mei, W. Hui, G. Hong, Y. Chen, G. Xing, *Small*, 2021, **17**, 2100560.
- S190. J. Chen, Z. Tang, Y. Zhou, S. Ding, L. Li, L. Qian, C. Xiang, *Small*, 2023, **19**, 2207520.
- S191. M. Yan, L. Zhou, L. Wang, G. Luo, L. Xu, D. Yang, Y. Fang, *Small*, 2024, **20**, 2309233.
- S192. J. Zhang, X. Xing, D. Qian, A. Wang, L. Gu, Z. Kuang, J. Wang, H. Zhang, K. Wen, W. Xu, M. Niu, X. Du, L. Yuan, C. Cao, Y. Cao, L. Zhu, N. Wang, C. Yi, W. Huang, J. Wang, *Adv. Funct. Mater.*, 2022, **32**, 2111578.
- S193. K.H. Ngai, X. Sun, Y. Wang, L. Lin, Z. Chen, Q. Wei, M. Li, C. Luan, W. Zhang, J. Xu, M. Long, *Adv. Funct. Mater.*, 2023, **33**, 2211830.
- S194. C. Yi, A. Wang, C. Cao, Z. Kuang, X. Tao, Z. Wang, F. Zhou, G. Zhang, Z. Liu, H. Huang, Y. Cao, R. Li, N. Wang, W. Huang, J. Wang, *Adv. Mater.*, 2024, 2400658.
